# Supplementary material for: Variable Selection in the Regularized Simultaneous Component Analysis Method for Multi-Source Data Integration
Source: Springer Nature journal article supplement (doi:10.1038/s41598-019-54673-2), 2019-12-09
Supplement: 41598_2019_54673_MOESM1_ESM.pdf [file 41598_2019_54673_MOESM1_ESM.pdf]

Supplementary material - R script for replication of the studies

1. function: repeated double CV

```
##### parameters
```

```
#####
```

```
# DATA: concatenated data matrix
```

```
# Jk: number of variables (a vector, the elements of which correspond to the datablocks)
```

```
# R: number of components
```

```
# LassoSequence: A sequence of Lasso tuning parameters
```

```
# GLassoSequence: A sequence of Group Lasso tuning parameters
```

```
# n_rep: number of repetitions
```

```
# n_seg: number of segments
```

```
# N_cores: number of cores (for parallel computing)
```

```
#####
```

```
##
```

```
M1_repeatedDoubleCV <- function(DATA, R, Jk, N_cores, LassoSequence, GLassoSequence, n_rep,  
n_seg, NRSTARTS, nfolds, MaxIter){
```

```
  #library(RegularizedSCA)
```

```
  #library(foreach)
```

```
  #library(snow)
```

```
  #library(doSNOW)
```

```
  #library(doRNG)
```

```
  if(missing(N_cores)){
```

```
    N_cores = 1
```

```
  }
```

```
  if(missing(n_rep)){
```

```
n_rep <- 10  
}
```

```
if(missing(n_seg)){  
  n_seg <- 3  
}
```

```
if(missing(LassoSequence)){  
  LassoSequence = seq(0.001, RegularizedSCA::maxLGlasso(DATA, Jk, R)$Lasso, length.out = 10)  
}
```

```
if(missing(GLassoSequence)){  
  GLassoSequence = seq(0.001, RegularizedSCA::maxLGlasso(DATA, Jk, R)$Glasso, length.out = 10)  
}
```

```
if(missing(NRSTARTS)){  
  NRSTARTS = 1  
}
```

```
DATA <- data.matrix(DATA)  
nsub <- dim(DATA)[1]
```

```
##### Repeated Double CV  
#####
```

```
perc_test <- 1/n_seg
```

```
cl <- snow::makeCluster(N_cores)
```

```
doSNOW::registerDoSNOW(cl)
```

```
#note that set.seed() and %dornng% ensure that parallel computing generates reproducible results.
```

```
sim_result <- foreach::foreach(r = 1:n_rep, .combine='cbind') %dornng% {
```

```
  Flag_person <- 0 # this, together with the following while(min_person=0), is to ensure that
```

```
  # the number of subject in testset > number of components. !!! important
```

```
  randindex <- stats::runif(nsub, 0, 1)
```

```
  testset_indexsize <- array(NA, n_seg) #note that each element in the array will be compared to R.
```

```
  while(Flag_person == 0){
```

```
    for(i in 1:n_seg){
```

```
      #randindex <- runif(nsub, 0, 1)
```

```
      testset_index <- ((i - 1) * perc_test < randindex) & (randindex < i * perc_test)
```

```
      testset_indexsize[i] <- sum(testset_index)
```

```
    }
```

```
    if(sum(testset_indexsize<=R)>0){
```

```
      randindex <- stats::runif(nsub, 0, 1) #The number of persons should be > than R. if not, resample.
```

```
    }else{
```

```
      Flag_person <- 1
```

```
    }
```

```
  }
```

```
  #e_hat <- array()
```

```
  OptimumLasso <- array()
```

```
  OptimumGLasso <- array()
```

```
  for(i in 1:n_seg){
```

```

testset_index <- ((i - 1) * perc_test < randindex) & (randindex < i * perc_test)

#testset <- DATA[testset_index, ]

calibset <- DATA[!testset_index, ]

results_innerloop <- RegularizedSCA::cv_sparseSCA(calibset, Jk, R, MaxIter, NRSTARTS,
LassoSequence, GLassoSequence, nfolds, method = "component")

OptimumLasso[i] <- results_innerloop$RecommendedLambda[1]

OptimumGLasso[i] <- results_innerloop$RecommendedLambda[2]

#estimatedP <- results_innerloop$P_hat

#A <- t(estimatedP) %*% t(testset)

#SVD_DATA <- svd(A, R, R)

#estimatedT <- SVD_DATA$v %*% t(SVD_DATA$u)

#e_hat[i] <- sum((testset - estimatedT %*% t(estimatedP))^2) COMMENTS: According to Filzmoser,
Liebmann, & Varmuza (2009), no need to

#compute MSE. One may simply check the frequency table of the optimal lasso and glasso tuning
parameter values. This is why I omit the MSE steps.

}

final_sim <- cbind(OptimumLasso, OptimumGLasso)

#final_sim[[3]] <- e_hat

return(final_sim)

}

snow::stopCluster(cl)

#results <- list()

#results$Lasso <- OptimumLasso

```

```

#results$GLasso <- OptimumGLasso
#results$e_hat <- E_hat

return_tables <- list(Lasso = table(sim_result[, colnames(sim_result) == "OptimumLasso"]),
                     GroupLasso = table(sim_result[, colnames(sim_result) == "OptimumGLasso"]))
return(return_tables)
}

```

## 2. function: BIC and IS

```

##### parameters
#####

# DATA: concatenated data matrix

# Jk: number of variables (a vector, the elements of which correspond to the datablocks)

# R: number of components

# LassoSequence: A sequence of Lasso tuning parameters

# GLassoSequence: A sequence of Group Lasso tuning parameters

#####
#####

M2_BIC_IS <- function(DATA, Jk, R, LassoSequence, GLassoSequence, NRSTARTS, MaxIter){

  DATA <- data.matrix(DATA)
  n_sub <- dim(DATA)[1]

  if(missing(LassoSequence)){
    LassoSequence = seq(0.001, RegularizedSCA::maxLGLasso(DATA, Jk, R)$Lasso, length.out = 20)
  }
}

```

```
if(missing(GLassoSequence)){  
  GLassoSequence = seq(0.001, RegularizedSCA::maxLGLasso(DATA, Jk, R)$GLasso, length.out = 20)  
}
```

```
if(missing(NRSTARTS)){  
  NRSTARTS = 5  
}
```

```
VarSelect0 <- RegularizedSCA::sparseSCA(DATA, Jk, R, LASSO = 0, GROUPLASSO = 0, MaxIter,  
NRSTARTS, method = "component")
```

```
P_hat0 <- VarSelect0$Pmatrix
```

```
T_hat0 <- VarSelect0$Tmatrix
```

```
V_0 <- sum((DATA - T_hat0%*%t(P_hat0))^2) # this is for BIC_Croux and BIC_GUO
```

```
error_var <- V_0 / n_sub #this is for BIC_Guo
```

```
V_oo <- sum(DATA^2) # this is for Index of sparseness (IS)
```

```
V_s <- sum((T_hat0%*%t(P_hat0))^2) # this is for IS
```

```
BIC_Croux <- matrix(NA, length(LassoSequence), length(GLassoSequence))
```

```
BIC_Guo <- matrix(NA, length(LassoSequence), length(GLassoSequence))
```

```
IS <- matrix(NA, length(LassoSequence), length(GLassoSequence))
```

```
for(i in 1:length(LassoSequence)){
```

```
  for(j in 1:length(GLassoSequence)){
```

```
    VarSelect <- RegularizedSCA::sparseSCA(DATA, Jk, R, LASSO = LassoSequence[i], GROUPLASSO =  
GLassoSequence[j], MaxIter, NRSTARTS = NRSTARTS, method = "component")
```

```
    P_hat <- VarSelect$Pmatrix
```

```
    T_hat <- VarSelect$Tmatrix
```

```

V_tilde <- sum((DATA - T_hat %*% t(P_hat))^2)

BIC_Croux[i, j] <- V_tilde / V_0 + sum(P_hat != 0) * log(n_sub) / n_sub # this is the BIC index
prop0sed by Croux et al.

BIC_Guo[i, j] <- V_tilde / error_var + sum(P_hat != 0) * log(n_sub) # this is the BIC index proposed
by Guo et al.

V_a <- sum((T_hat %*% t(P_hat))^2) # this is for IS
IS[i, j] <- V_a * V_s / V_oo^2 * sum(P_hat == 0) / (sum(Jk) * R) # this is index of sparseness
}
}

BIC_list <- list(Croux = BIC_Croux, GUO = BIC_Guo, IS = IS)
return(BIC_list)
}

```

### 3. Bolasso

#Bolasso with CV

# Input parameters:

# DATA: Concatenated data matrix (!!! Not standardized! the matrix will be standardized after each resampling)

# Jk: A vector. Each element of this vector is the number of columns of a data block

# N\_boots: number of bootstrap replicates

# R: The number of components (R>=2)

# LassoSequence: A vector of lasso tuning parameter values in ascending order

# GlassoSequence: A vector of Group Lasso tuning parameter values in ascending order

# N\_cores: Number of cores for parallel computing

```
Bolasso_CV <- function(DATA, Jk, R, N_boots, LassoSequence, GLassoSequence, N_cores, NRSTARTS,
nfolds, MaxIter){
```

```
  #library(foreach)
```

```
  #library(doSNOW)
```

```
  #library(doRNG)
```

```
  #library(RegularizedSCA)
```

```
  DATA <- data.matrix(DATA) #DATA should be pre-processed at this stage
```

```
  if(missing(LassoSequence)){
```

```
    LassoSequence = seq(0.001, RegularizedSCA::maxLGLasso(DATA, Jk, R)$Lasso, length.out = 20)
```

```
  }
```

```
  if(missing(GLassoSequence)){
```

```
    GLassoSequence = seq(0.001, RegularizedSCA::maxLGLasso(DATA, Jk, R)$GLasso, length.out = 20)
```

```
  }
```

```
  if(missing(NRSTARTS)){
```

```
    NRSTARTS = 1
```

```
  }
```

```
  n_persons <- nrow(DATA)
```

```
  person_index <- sample(1:n_persons, n_persons, replace = TRUE)
```

```
  Data_sample <- DATA[person_index, ]
```

```
  result <- RegularizedSCA::cv_sparseSCA(Data_sample, Jk, R, MaxIter, NRSTARTS, LassoSequence,
GLassoSequence, nfolds, method = "component")
```

```
  T_target <- result$T_hat      #We fix the estimated T matrix from the first resampled data.
```

```
    #All the estimated T matrix are to be compared to this estimated T.
```



```

#(This is due to permutation freedom)

P_indexset <- result$P_hat
P_indexset[which(P_indexset!=0)] <- 1 #non-zero loadings are marked as 1

#resampling
cl <- snow::makeCluster(N_cores)
doSNOW::registerDoSNOW(cl)
#note that set.seed() and %dornrg% ensure that parallel computing generates reproducible results.
sim_result <- foreach::foreach(i = 1:(N_boots-1), .combine='+') %dornrg% {

  person_index <- sample(1:n_persons, n_persons, replace = TRUE)
  Data_sample <- DATA[person_index, ]
  result <- RegularizedSCA::cv_sparseSCA(Data_sample, Jk, R, MaxIter, NRSTARTS, LassoSequence,
GLassoSequence, nfolds, method = "component")
  T_result <- result$T_hat
  perm <- RegularizedSCA::TuckerCoef(T_target, T_result)$perm
  P_result <- result$P_hat[, perm]
  P_result[which(P_result!=0)] <- 1

  return(P_result)

}

snow::stopCluster(cl)

P_indexset <- data.frame(sim_result) + P_indexset

P_indexset[P_indexset != N_boots] <- 0 #Variables that have not been selected N_boots times are set
to be zero

```

```

# Reestimate P and T, with 5 multi-starts
Pout3d <- list()
Tout3d <- list()
LOSS <- array()
LOSSvec <- list()

for (n in 1:5) {
  VarSelectResult <- StrucSCA_withIndex(DATA, Jk, R, P_indexset = P_indexset, MaxIter)
  Pout3d[[n]] <- VarSelectResult$Pmatrix
  Tout3d[[n]] <- VarSelectResult$Tmatrix
  LOSS[n] <- VarSelectResult$Loss
  LOSSvec[[n]] <- VarSelectResult$Lossvec
}
k <- which(LOSS == min(LOSS))
if (length(k) > 1) {
  pos <- sample(1:length(k), 1)
  k <- k[pos]
}

PoutBest <- Pout3d[[k]] #this is the final, estimated P
ToutBest <- Tout3d[[k]] #this is the final, estimated T

return_list <- list(P_hat = PoutBest, T_hat = ToutBest)
return(return_list)

}

```

#### 4. stability selection adjusted for RSCA

```

##### parameters
#####

# DATA: concatenated data matrix

# Jk: number of variables (a vector, the elements of which correspond to the datablocks)

# R: number of components

# LassoSequence: A sequence of Lasso tuning parameters

# N_loading: The total number of non-zero loadings in the P matrix

# Thr: threshold for the probability of each loading; the default is .9

# NRSTARTS: Number of random starts

# N_cores: number of CPU logical cores can be used

#####
#####

M4_StabSelection <- function(DATA, Jk, R, LassoSequence, N_loading, Thr, NRSTARTS, N_cores, nfolds,
MaxIter){

  DATA <- data.matrix(DATA)

  n_persons <- nrow(DATA)

  if(missing(LassoSequence)){

    LassoSequence = exp(seq(from = log(0.00000001), to = log(RegularizedSCA::maxLGLasso(DATA, Jk,
R)$Lasso), length.out = 100))

  }

  if(missing(NRSTARTS)){

    NRSTARTS = 5

  }

  if(missing(Thr)){

    Thr = .5

  }

```

```
}
```

```
# need a target matrix for T, so that all the estimated T can be compared to it.
```

```
result <- RegularizedSCA::cv_sparseSCA(DATA, Jk, R, MaxIter, NRSTARTS, LassoSequence,  
GLassoSequence=0, nfolds, method = "component")
```

```
T_target <- result$T_hat      #We fix the estimated T matrix. All the estimated P in the following  
resampling procedure will be rotated
```

```
      #after comparing the estimated T with with T_target.
```

```
      #Arguably, using CV to generate T_target might not be a good idea. By the time  
I'm writing this code, I have already
```

```
      #found out that index of sparseness works better. But CV is the most well known  
method, so I use CV here.
```

```
LassoSequence <- sort(LassoSequence, decreasing = T) # the largest value enters first
```

```
P_prob <- list()
```

```
#### this is for P_prob[[1]], which is when used to compare to P_prob[[j]] (j= 2, ...) so as to record the  
highest probability across all j's (j=1,...)
```

```
cl <- snow::makeCluster(N_cores)
```

```
doSNOW::registerDoSNOW(cl)
```

```
#note that set.seed() and %dorng% ensure that parallel computing generates reproducible results.
```

```
sim_result <- foreach::foreach(i = 1:100, .combine='+') %dorng% {
```

```
  person_index <- sample(1:n_persons, n_persons/2, replace = F)
```

```
  result <- RegularizedSCA::sparseSCA(DATA[person_index, ], Jk, R, LASSO = LassoSequence[1],  
GROUPLASSO = 0, MaxIter, NRSTARTS, method = "component")
```

```
  perm <- RegularizedSCA::TuckerCoef(T_target[person_index, ], result$Tmatrix)$perm
```

```
  P_result <- result$Pmatrix[, perm]
```

```
  P_result[which(P_result!=0)] <- 1
```

```
  return(P_result)
```

```

}
snow::stopCluster(cl)
P_prob[[1]] <- data.frame(sim_result)/100
P_final <- P_prob[[1]] #P_final will be updated after each comparison (see below)
j <- 2
while(j <= length(LassoSequence)){ #note that it is not necessary to run j all the way to the
length(LassoSequence), to some point, this algorithm will stop because enough non-zero loadings are
gathered.
  cl <- snow::makeCluster(N_cores)
  doSNOW::registerDoSNOW(cl)
  #note that set.seed() and %dorng% ensure that parallel computing generates reproducible results.
  sim_result <- foreach::foreach(i = 1:100, .combine='+') %dorng% {

    person_index <- sample(1:n_persons, n_persons/2, replace = F)
    result <- RegularizedSCA::sparseSCA(DATA[person_index, ], Jk, R, LASSO = LassoSequence[j],
GROUPLASSO = 0, MaxIter, NRSTARTS, method = "component")
    perm <- RegularizedSCA::TuckerCoef(T_target[person_index, ], result$Tmatrix)$perm
    P_result <- result$Pmatrix[, perm]
    P_result[which(P_result!=0)] <- 1

    return(P_result)

  }
snow::stopCluster(cl)

P_prob[[j]] <- data.frame(sim_result)/100

index <- which((P_final < P_prob[[j]]), arr.ind = TRUE) # which((P_final < P_prob[[j]]) == TRUE, arr.ind
= TRUE) is also fine

```

```

P_final[index] <- P_prob[[j]][index] #update the P_final matrix, keep the highest probability

if(sum(P_prob[[j]] >= Thr) > N_loading){
  j <- length(LassoSequence) # just a way to skip the remaining Lasso values, since the total number of
non-zero loadings already > N_loading prespecified by the user
}

j <- j+1
print(j)
}

# Note that in the above code if(sum(P_prob[[j]] >= Thr) > N_loading), it could happen that at j,
sum(P_prob[[j]]) >> N_loading. We would want to reduce the size of sum(P_prob[[j]]) close to N_loading
thr_new <- sort(as.matrix(P_final), decreasing = TRUE)[N_loading] # this is the lowest probability whose
corresponding loading should not be zero, ACCORDING TO N_loading
if(dim(which(P_final== thr_new, arr.ind = TRUE))[1] > 1){
  print("It's likely that the total # of non-0 loadings in the final P_hat greatly exceeds N_loading!") #this
is problematic, in this case, more than one loading corresponds to the lowest probability.
}

P_final[which(P_final < thr_new, arr.ind = TRUE)] <- 0

# Reestimate P and T, with 5 starts
Pout3d <- list()
Tout3d <- list()
LOSS <- array()
LOSSvec <- list()

for (n in 1:NRSTARTS) {
  VarSelectResult <- StrucSCA_withIndex(DATA, Jk, R, P_indexset = P_final, MaxIter)

```

```

Pout3d[[n]] <- VarSelectResult$Pmatrix
Tout3d[[n]] <- VarSelectResult$Tmatrix
LOSS[n] <- VarSelectResult$Loss
LOSSvec[[n]] <- VarSelectResult$Lossvec
}
k <- which(LOSS == min(LOSS))
if (length(k) > 1) {
  pos <- sample(1:length(k), 1)
  k <- k[pos]
}

PoutBest <- Pout3d[[k]] #this is the final, estimated P
ToutBest <- Tout3d[[k]] #this is the final, estimated T

return_list <- list(P_hat = PoutBest, T_hat = ToutBest)
return(return_list)

}

```

5. generating data: 2 blocks

```
set.seed(1)
```

```
Perc0 = .5 #.3 or .5
```

```
PropNoise = 0.3 # .005, .3
```

```
I <- 20 # 20 or 100
```

```
J1 <- 120 # 40 or 120
```

```
J2 <- 30 # 10 or 30
```

```
Jk <- c(J1, J2)
```

```
R <- 3
```

```
N_dataset <- 20 #how many datasets to generate
```

```
#####  
#####
```

```
# A function for generating data
```

```
#####  
#####
```

```
Data_generation <- function(l, J1, J2, R, PropNoise, Perc0, N_dataset){
```

```
  Jk <- c(J1, J2)
```

```
  sumJk <- sum(J1 + J2)
```

```
  DATA1 <- matrix(rnorm(l*J1, mean = 0, sd = 1), l, J1)
```

```
  DATA2 <- matrix(rnorm(l*J2, mean = 0, sd = 1), l, J2)
```

```
  DATA <- cbind(DATA1, DATA2)
```

```
  svddata <- svd(DATA, R, R)
```

```
  Ttrue <- svddata$u
```

```
  PTrueC <- as.matrix(svddata$v) %*% diag(svddata$d[1:R]) #note that only the first R eigen values are  
  needed.
```

```
  PTrueCBlock1 <- PTrueC[1:J1,]
```

```
  PTrueCBlock2 <- PTrueC[(J1+1):(J1+J2),]
```

```
  PTrueCBlock1[, 2] <- 0
```



```

PTrueCBlock2[, 3] <- 0

v <- sample(1:J1, size = round(Perc0*J1), replace = F)
PTrueCBlock1[, 3][v] <- 0
v <- sample(1:J2, size = round(Perc0*J2), replace = F)
PTrueCBlock2[, 2][v] <- 0
PTrueC_bind <- rbind(PTrueCBlock1, PTrueCBlock2)
v <- sample(1:sumJk, size = round(Perc0*sumJk), replace = F)
PTrueC_bind[, 1][v] <- 0
PTrueCnew <- PTrueC_bind

XTrue <- Ttrue %**% t(PTrueCnew)
SSXtrue <- sum(XTrue ^ 2)

Noise <- matrix(rnorm(l*(J1+J2), mean = 0, sd = 1), l, J1+J2)
SSNoise <- sum(Noise ^ 2)
g <- sqrt(PropNoise*SSXtrue/(SSNoise-PropNoise*SSNoise))
NoiseNew <- g*Noise
#SSNoiseNew <- sum(NoiseNew ^ 2)
Xgenerate <- XTrue + NoiseNew
#SSXgenerate <- sum(Xgenerate ^ 2)
#NoiseVSgenerate <- SSNoiseNew/SSXgenerate

Data_final <- list(data = Xgenerate, T_mat = Ttrue, P_mat = PTrueCnew)
return(Data_final)

}

```

```
#####  
#####
```

```
k <- 1  
while(k <= N_dataset){  
  
  my_data_list <- Data_generation(I, J1, J2, R, PropNoise, Perc0)  
  
  filename <- paste("Data_", k, ".RData", sep = "")  
  save(my_data_list, PropNoise, Perc0, file = filename)  
  #beta_paramter <- paste("beta_", num_test, ".RData", sep = "")  
  #save(beta_pre, beta1, beta2, file = beta_paramter)  
  k <- k + 1  
  
}
```

6. generating data: 4 blocks

```
set.seed(1)
```

```
Perc0 = .5 #.3 or .5
```

```
PropNoise = 0.005 # .005, .3
```

```
I <- 20
```

```
J1 <- 120
```

```
J2 <- 30
```

```
J3 <- 40
```

```
J4 <- 10
```

```
Jk <- c(J1, J2, J3, J4)
```

```
R <- 3
```

```
N_dataset <- 20 #how many datasets to generate
```

```
#####  
#####
```

```
# A function for generating data
```

```
#####  
#####
```

```
Data_generation <- function(l, J1, J2, J3, J4, R, PropNoise, Perc0, N_dataset){
```

```
  Jk <- c(J1, J2, J3, J4)
```

```
  sumJk <- sum(J1 + J2 + J3 + J4)
```

```
  DATA1 <- matrix(rnorm(l*J1, mean = 0, sd = 1), l, J1)
```

```
  DATA2 <- matrix(rnorm(l*J2, mean = 0, sd = 1), l, J2)
```

```
  DATA3 <- matrix(rnorm(l*J3, mean = 0, sd = 1), l, J3)
```

```
  DATA4 <- matrix(rnorm(l*J4, mean = 0, sd = 1), l, J4)
```

```
  DATA <- cbind(DATA1, DATA2, DATA3, DATA4)
```

```
  svddata <- svd(DATA, R, R)
```

```
  Ttrue <- svddata$u
```

```
  PTrueC <- as.matrix(svddata$v) %*% diag(svddata$d[1:R]) #note that only the first R eigen values are  
  needed.
```

```
  PTrueCBlock1 <- PTrueC[1:J1,]
```

```
  PTrueCBlock2 <- PTrueC[(J1+1):(J1+J2),]
```

```
  PTrueCBlock3 <- PTrueC[(J1+J2+1):(J1+J2+J3),]
```

```
  PTrueCBlock4 <- PTrueC[(J1+J2+J3+1):(J1+J2+J3+J4),]
```

```
PTrueCBlock1[, 3] <- 0
```

```
PTrueCBlock3[, 2] <- 0
```

```
PTrueCBlock4[, c(2,3)] <- 0
```

```
v <- sample(1:J1, size = round(Perc0*J1), replace = F)
```

```
PTrueCBlock1[, 1][v] <- 0
```

```
v <- sample(1:J1, size = round(Perc0*J1), replace = F)
```

```
PTrueCBlock1[, 2][v] <- 0
```

```
v <- sample(1:J2, size = round(Perc0*J2), replace = F)
```

```
PTrueCBlock2[, 1][v] <- 0
```

```
v <- sample(1:J2, size = round(Perc0*J2), replace = F)
```

```
PTrueCBlock2[, 2][v] <- 0
```

```
v <- sample(1:J2, size = round(Perc0*J2), replace = F)
```

```
PTrueCBlock2[, 3][v] <- 0
```

```
v <- sample(1:J3, size = round(Perc0*J3), replace = F)
```

```
PTrueCBlock3[, 1][v] <- 0
```

```
v <- sample(1:J3, size = round(Perc0*J3), replace = F)
```

```
PTrueCBlock3[, 3][v] <- 0
```

```
v <- sample(1:J4, size = round(Perc0*J4), replace = F)
```

```
PTrueCBlock4[, 1][v] <- 0
```

```
PTrueC_bind <- rbind(PTrueCBlock1, PTrueCBlock2, PTrueCBlock3, PTrueCBlock4)
```

```
PTrueCnew <- PTrueC_bind
```

```
XTrue <- Ttrue %**% t(PTrueCnew)
```

```

SSXtrue <- sum(XTrue ^ 2)

Noise <- matrix(rnorm(l*(J1+J2+J3+J4), mean = 0, sd = 1), l, J1+J2+J3+J4)
SSNoise <- sum(Noise ^ 2)
g <- sqrt(PropNoise*SSXtrue/(SSNoise-PropNoise*SSNoise))
NoiseNew <- g*Noise
#SSNoiseNew <- sum(NoiseNew ^ 2)
Xgenerate <- XTrue + NoiseNew
#SSXgenerate <- sum(Xgenerate ^ 2)
#NoiseVSgenerate <- SSNoiseNew/SSXgenerate

Data_final <- list(data = Xgenerate, T_mat = Ttrue, P_mat = PTrueCnew)
return(Data_final)

}

#####
#####

k <- 1
while(k <= N_dataset){

my_data_list <- Data_generation(l, J1, J2, J3, J4, R, PropNoise, Perc0)

filename <- paste("Data_", k, ".RData", sep = "")
save(my_data_list, PropNoise, Perc0, file = filename)
#beta_paramter <- paste("beta_", num_test, ".RData", sep = "")
#save(beta_pre, beta1, beta2, file = beta_paramter)

```

```
k <- k + 1
```

```
}
```

## 7. Empirical data

```
#####
```

```
#### Illustrative applications
```

```
#####
```

```
library(devtools)
```

```
install_github("ZhengguoGu/RegularizedSCA") #load the latest R package from Github
```

```
library(RegularizedSCA)
```

```
##### 1. analysis of the herring data #####
```

```
#1) load the package and data, and pre-process the data
```

```
library(RegularizedSCA)
```

```
names(Herring) #the herring data is included in the package RegularizedSCA
```

```
ChemPhy <- pre_process(Herring$Herring_ChemPhy)
```

```
Sensory <- pre_process(Herring$Herring_Sensory)
```

```
herring_data <- cbind(ChemPhy, Sensory)
```

```
num_var <- cbind(dim(ChemPhy)[2], dim(Sensory)[2])
```

```
R <- 4 # known based on previous research Gu and Van Deun 2018
```

```
Lassosequence <- seq(0.0000001, maxLGllasso(herring_data, num_var, R)$Lasso, length.out = 50)
```

```
GLassoSequence <- seq(0.0000001, maxLGlasso(herring_data, num_var, R)$Glasso, length.out = 50)
```

```
#2) load function M2_BIC12andIS.R
```

```
source("M2_BIC12andIS.R")
```

```
set.seed(115)
```

```
ptm <- proc.time()
```

```
result_her_BICIS <- M2_BIC_IS(herring_data, num_var, R, LassoSequence = LassoSequence,  
GLassoSequence = GLassoSequence, NRSTARTS=5)
```

```
IS_index <- which(result_her_BICIS$IS == max(result_her_BICIS$IS), arr.ind = T)
```

```
Lasso_IS <- max(LassoSequence[IS_index[1]])
```

```
Glasso_IS <- max(GLassoSequence[IS_index[2]])
```

```
final_her_IS <- RegularizedSCA::sparseSCA(herring_data, num_var, R, LASSO = Lasso_IS, GROUPLASSO =  
Glasso_IS, MaxIter = 400, NRSTARTS = 20, method = "component")
```

```
savetime_her_IS <- proc.time() - ptm
```

```
save(final_her_IS, savetime_her_IS, file="her_IS.RData")
```

```
#4) generate a table
```

```
load("her_IS.RData")
```

```
set.seed(115)
```

```
final_her_IS <- undoShrinkage(herring_data, R,
```

```
                  final_her_IS$Pmatrix)
```

```
final_her_IS$Pmatrix
```

```
final_her_IS$Tmatrix
```

```
write.table(final_her_IS$Pmatrix, "final_herring_P.csv", sep = ",")
```

```
write.table(final_her_IS$Tmatrix, "final_herring_T.csv", sep = ",")
```

```
##### 2. analysis of metabolomics data #####
```

```
# 1) load data
```

```
MyData <- read.csv(file="metabolomics.csv", header=TRUE, sep=",") #cannot share on Github! Stored at  
the authors local computers.
```

```
meta1 <- pre_process(MyData[, 1:144])
```

```
meta2 <- pre_process(MyData[, 145:188])
```

```
metabolomics_data <- cbind(meta1, meta2)
```

```
num_var <- c(144,4)
```

```
R <- 5 # known based on previous research Gu and Van Deun 2016
```

```
Lassosequence <- seq(0.0000001, maxLGlasso(metabolomics_data , num_var, R)$Lasso, length.out = 50)
```

```
GLassosequence <- seq(0.0000001, maxLGlasso(metabolomics_data , num_var, R)$Glasso, length.out =  
50)
```

```
#2) load function M2_BIC12andIS.R
```

```
source("M2_BIC12andIS.R")
```

```
set.seed(115)
```

```
ptm <- proc.time()
```

```
result_meta_BICIS <- M2_BIC_IS(metabolomics_data, num_var, R, LassoSequence = Lassosequence,  
GLassoSequence = GLassosequence, NRSTARTS=5)
```

```
IS_index <- which(result_meta_BICIS$IS == max(result_meta_BICIS$IS), arr.ind = T)
```

```
Lasso_IS <- max(Lassosequence[IS_index[1]])
```

```
Glasso_IS <- max(GLassosequence[IS_index[2]])
```



```
final_meta_IS <- RegularizedSCA::sparseSCA(metabolomics_data, num_var, R, LASSO = Lasso_IS,
GROUPLASSO = Glasso_IS, MaxIter = 400, NRSTARTS = 20, method = "component")
```

```
savetime_meta_IS <- proc.time() - ptm
```

```
final_meta_IS$Pmatrix
```

```
save(final_meta_IS, savetime_meta_IS, file="meta_IS.RData")
```

```
set.seed(115)
```

```
final_meta_IS <- undoShrinkage(metabolomics_data, R,
                             final_meta_IS$Pmatrix)
```

```
final_meta_IS$Pmatrix
```

```
#4) We draw a heatmap for IS
```

```
Pmat <- final_meta_IS$Pmatrix
```

```
keepname <- rownames(Pmat)
```

```
short_name <- array() #some of the variable names are too long, we can shorten the the names (in case
we want to)
```

```
for(i in 1:length(keepname)){
  short_name[i] <- substring(keepname[i], first = 1, last = 27)
}
```

```
colnames(Pmat) <- c('C1', 'C2', 'C3', 'C4', 'C5')
```

```
library(ggplot2)
```

```
names <- short_name
```

```
component <- colnames(Pmat)
```

```
PmatVec <- c(Pmat)
```

```
names <- rep(names, 5)
```

```
component <- rep(component, each = 188)
```

```
# note that part of the ggplot code below is from https://learnr.wordpress.com/2010/01/26/ggplot2-quick-heatmap-plotting/
```

```
# which is a website for drawing heatmap using ggplot2.
```

```
Pmat_dataframe <- data.frame(Loadings = PmatVec, Variables = factor(names, ordered = T, levels = short_name), Components = component)
```

```
p <- ggplot(Pmat_dataframe, aes(x = Components, y = Variables) )+  
  geom_tile(aes(fill = Loadings), colour = "white") +  
  scale_fill_gradient2(low="green", mid = "black", high = "red")
```

```
p + theme_grey(base_size = 15) + labs(x = "", y = "") +  
  scale_x_discrete(expand = c(0, 0)) +  
  scale_y_discrete(expand = c(0, 0))
```

```
##### 3. re-analysis of the parent-child relationship survey data #####
```

```
#1) load data
```

```
load("family_data.RData")
```

```
data<- cbind(pre_process(family_data[[1]]), pre_process(family_data[[2]]),  
pre_process(family_data[[3]]))
```

```
num_var <- cbind(dim(family_data[[1]])[2], dim(family_data[[2]])[2], dim(family_data[[3]])[2])
```

```
R <- 5 # known based on previous research
```

```
Lassosequence <- seq(0.0000001, maxLGlasso(data, num_var, R)$Lasso, length.out = 50)
```

```
GLassosequence <- seq(0.0000001, maxLGlasso(data, num_var, R)$Glasso, length.out = 50)
```

```
#2) load function M2_BIC12andIS.R
```

```
source("M2_BIC12andIS.R")
```

```

set.seed(115)

ptm <- proc.time()

result_fam_BICIS <- M2_BIC_IS(data, num_var, R, LassoSequence = LassoSequence, GLassoSequence =
GLassoSequence, NRSTARTS=5)

IS_index <- which(result_fam_BICIS$IS == max(result_fam_BICIS$IS), arr.ind = T)

Lasso_IS <- max(LassoSequence[IS_index[1]])

Glasso_IS <- max(GLassoSequence[IS_index[2]])

final_IS <- RegularizedSCA::sparseSCA(data, num_var, R, LASSO = Lasso_IS, GROUPLASSO = Glasso_IS,
MaxIter = 400, NRSTARTS = 20, method = "component")

savetime_family_IS <- proc.time() - ptm

save(final_IS, savetime_family_IS, file="family_IS.RData")

```

#4) Undo the shrinkage and generate a table

# In Table 2, the component loading matrix obtained from Gu and Van Deun 2018, the authors undo the shrinkage, Hence, we undo the shrinkage here.

```
load("familytarget.RData") # this is the T matrix of the Family data from Gu and Van deun 2018.
```

```
perm2 <- RegularizedSCA::TuckerCoef(family_target, final_IS$Tmatrix)$perm
final_IS_result <- final_IS$Pmatrix[, perm2] #final P matrix for IS
```

```

set.seed(115)

final_fam_IS <- undoShrinkage(data, R = 5,
                             final_IS_result) #position of components changed so as to be compared to the results
by RdCV

final_fam_IS$Pmatrix

write.table(final_fam_IS$Pmatrix, "final_fam.csv", sep = ",")

```

#!note, the final\_fam\_ISSPmatrix is different from the the reported matrix in paper in terms of signs.  
Because regularized SCA is invariant with respect to the sign, we manually changed the signs  
# so that it is easier to compared to Figure 2. The interpretation does not change as a result of change of signs.

8. simulation: 2 blocks

```
library(devtools)
```

```
install_github("ZhengguoGu/RegularizedSCA")
```

```
library(RegularizedSCA)
```

```
library(foreach)
```

```
library(snow)
```

```
library(doSNOW)
```

```
library(doRNG)
```

```
##### LOAD functions #####
```

```
#please load the following functions first
```

```
#1. M1_repeatedDoubleCV.R
```

```
#2. M2_BIC12andIS.R
```

```
#3. M3_Bolasso.R
```

```
#4. M4_StabSelection.R
```

```
#####  
#####
```

```
# StrucSCA_withIndex() estimates T and P, given the pre-defined structure of P
```

```
# This is used in M3_Bolasso.R and M4_StabSelection.R
```

```
#####  
#####
```

```

StrucSCA_withIndex <- function (DATA, Jk, R, P_indexset, MaxIter) {

# note that this function is needed for M3_Bolasso.R and M4_StabSelection.R

DATA <- data.matrix(DATA)

I_Data <- dim(DATA)[1]
sumJk <- dim(DATA)[2]
eps <- 10^(-12)
if (missing(MaxIter)) {
  MaxIter <- 300
}
P <- matrix(stats::rnorm(sumJk * R), nrow = sumJk, ncol = R)
P[P_indexset == 0] <- 0
Pt <- t(P)

residual <- sum(DATA^2)
Lossc <- residual

conv <- 0
iter <- 1
Lossvec <- array()
while (conv == 0) {

#### the block #####
A <- Pt %*% t(DATA)
SVD_DATA <- svd(A, R, R)
Tmat <- SVD_DATA$v %*% t(SVD_DATA$u)
#####

```

```
Lossu <- sum((DATA - Tmat %*% Pt)^2)
```

```
P <- t(DATA) %*% Tmat
```

```
P[P_indexset == 0] <- 0
```

```
Pt <- t(P)
```

```
Lossu2 <- sum((DATA - Tmat %*% Pt)^2)
```

```
if (abs(Lossu - Lossu2) < 10^(-9)) {
```

```
  Loss <- Lossu
```

```
  residual <- Lossu2
```

```
  P[abs(P) <= 2 * eps] <- 0
```

```
  conv <- 1
```

```
}
```

```
else if (iter > MaxIter) {
```

```
  Loss <- Lossu
```

```
  residual <- Lossu2
```

```
  P[abs(P) <= 2 * eps] <- 0
```

```
  conv <- 1
```

```
}
```

```
Lossvec[iter] <- Lossu
```

```
iter <- iter + 1
```

```
Lossc <- Lossu2
```

```
}
```

```
return_vareselect <- list()
```

```
return_vareselect$Pmatrix <- P
```

```
return_vareselect$Tmatrix <- Tmat
```

```
return_vareselect$Loss <- Loss
```

```
return_vareselect$Lossvec <- Lossvec
```

```
#return_vareselect$Residual <- residual
return(return_vareselect)
}
```

```
#####
#####
```

```
# Calculate the number of variables AND zero-loadings correctly selected
```

```
# Note: this function is about the total number of variables correctedly selected and zeros correctly retained
```

```
#
```

```
# for the number of variables correctly selected, and the number of zero loadings correctly identified, please see "sumarizing results.R"
```

```
#####
#####
```

```
num_correct <- function (TargetP, EstimatedP){
```

```
total_vnumber <- dim(TargetP)[1] * dim(TargetP)[2]
```

```
TargetP[which(TargetP != 0)] <- 1
```

```
sum_select <- sum(TargetP)
```

```
sum_zero <- total_vnumber - sum_select
```

```
EstimatedP[which(EstimatedP != 0)] <- 1
```

```
total_correct <- sum(TargetP == EstimatedP) # this is the total number of variables correctedly selected and zeros correctly retained
```

```
prop_correct <- total_correct/total_vnumber
```

```
return(prop_correct)
```

```
}
```

```
#####  
#####
```

```
#####  
#####
```

```
#####  
#####
```

```
####
```

```
#### Simulations
```

```
####
```

```
#####  
#####
```

```
N_cores <- 10 # number of cores for parallel computing
```

```
I <- 20
```

```
J1 <- 120
```

```
J2 <- 30
```

```
Jk <- c(J1, J2)
```

```
R <- 3
```

```
NRSTARTS <- 2 # #random starts
```

```
n_rep = 50 # #repetition for rdCV
```

```
n_seg = 2 # #segments for rdCV
```

```
N_boots = 50 # #repetition for BoLasso
```

```
nfolds = 5 # 5-fold CV
```



```
MaxIter = 300 # #maximum iterations
```

```
### 1. benchmark CV
```

```
set.seed(1)
```

```
n_dataset <- 1
```

```
N_dataset = 20
```

```
RESULT_BenchmarkCV <- matrix(NA, N_dataset, 2)
```

```
ESTIMATED_P <- list()
```

```
ESTIMATED_T <- list()
```

```
while(n_dataset <= N_dataset){
```

```
  filename <- paste("Data_", n_dataset, ".RData", sep = "")
```

```
  load(filename)
```

```
  post_data1 <- RegularizedSCA::pre_process(my_data_list$data[, 1:J1])
```

```
  post_data2 <- RegularizedSCA::pre_process(my_data_list$data[, (J1+1):(J1+J2)])
```

```
  POST_data <- cbind(post_data1, post_data2)
```

```
  Lassosequence <- seq(0.0000001, RegularizedSCA::maxLGLasso(POST_data, Jk, R)$Lasso, length.out = 50)
```

```
  GLassosequence <- seq(0.0000001, RegularizedSCA::maxLGLasso(POST_data, Jk, R)$Glasso, length.out = 50)
```

```
  result_sim1_BM <- RegularizedSCA::cv_sparseSCA(POST_data, Jk, R, MaxIter = MaxIter, NRSTARTS, Lassosequence, GLassosequence, nfolds, method = "component")
```

```
  tuckerresult <- RegularizedSCA::TuckerCoef(my_data_list$T_mat, result_sim1_BM$T_hat)
```

```
  RESULT_BenchmarkCV[n_dataset, 1] <- tuckerresult$tucker_value
```

```
  RESULT_BenchmarkCV[n_dataset, 2] <- num_correct(my_data_list$P_mat, result_sim1_BM$P_hat[, tuckerresult$perm])
```

```
  ESTIMATED_P[[n_dataset]] <- result_sim1_BM$P_hat
```

```
ESTIMATED_T[[n_dataset]] <- result_sim1_BM$T_hat
n_dataset <- n_dataset + 1
}
```

```
filename <- paste("I_", I, "_J1_", J1, "_J2_", J2, "_benchmark_CV", ".RData", sep = "")
save(RESULT_BenchmarkCV, ESTIMATED_P, ESTIMATED_T, file = filename)
```

```
### 2. repeated Double CV #####
```

```
n_dataset <- 1
N_dataset = 20
RESULT_rdCV <- matrix(NA, N_dataset, 2)
ESTIMATED_PrdCV <- list()
ESTIMATED_TrdrCV <- list()
```

```
set.seed(1)
while(n_dataset <= N_dataset){
```

```
  filename <- paste("Data_", n_dataset, ".RData", sep = "")
  load(filename)
```

```
  post_data1 <- RegularizedSCA::pre_process(my_data_list$data[, 1:J1])
  post_data2 <- RegularizedSCA::pre_process(my_data_list$data[, (J1+1):(J1+J2)])
  POST_data <- cbind(post_data1, post_data2)
```

```
  LassoSequence <- seq(0.0000001, RegularizedSCA::maxLGLasso(POST_data, Jk, R)$Lasso, length.out = 50)
```

```
GLassoquence <- seq(0.0000001, RegularizedSCA::maxLGLasso(POST_data, Jk, R)$Glasso, length.out = 50)
```

```
result_sim1_RDCV <- M1_repeatedDoubleCV(POST_data, R, Jk, N_cores, Lassosequence, GLassoquence, n_rep, n_seg, NRSTARTS, nfolds, MaxIter)
```

```
temp_lasso <- as.data.frame(result_sim1_RDCV$Lasso)
```

```
temp_lasso$Var1 <- sort(as.numeric(levels(temp_lasso$Var1)))
```

```
LASSO <- max(temp_lasso[temp_lasso[,2] == max(temp_lasso[,2]),1]) #the first max ensures that the largest Lasso value is chosen, in case more than one lasso value is recommended by M1_repeatedDoubleCV
```

```
temp_glasso <- as.data.frame(result_sim1_RDCV$GroupLasso)
```

```
temp_glasso$Var1 <- sort(as.numeric(levels(temp_glasso$Var1)))
```

```
GLASSO <- max(temp_glasso[temp_glasso[,2] == max(temp_glasso[,2]),1])
```

```
final_RDCV <- RegularizedSCA::sparseSCA(POST_data, Jk, R, LASSO = LASSO, GROUPLASSO = GLASSO, MaxIter, NRSTARTS, method = "component")
```

```
tuckerresult_RDCV <- RegularizedSCA::TuckerCoef(my_data_list$T_mat, final_RDCV$Tmatrix)
```

```
RESULT_rdcv[n_dataset, 1] <- tuckerresult_RDCV$tucker_value
```

```
RESULT_rdcv[n_dataset, 2] <- num_correct(my_data_list$P_mat, final_RDCV$Pmatrix[, tuckerresult_RDCV$perm])
```

```
ESTIMATED_PrdCV[[n_dataset]] <- final_RDCV$Pmatrix
```

```
ESTIMATED_Trdcv[[n_dataset]] <- final_RDCV$Tmatrix
```

```
n_dataset <- n_dataset + 1
```

```
print(n_dataset)
```

```
}
```

```
filename <- paste("I_", I, "_J1_", J1, "_J2_", J2, "_RepeatedDCV", ".RData", sep = "")
save(RESULT_rdCV, ESTIMATED_PrDCV, ESTIMATED_TrDCV, file = filename)
```

```
### 3. BIC and IS #####
```

```
n_dataset <- 1
```

```
N_dataset = 20
```

```
RESULT_BIC <- matrix(NA, N_dataset, 2)
```

```
RESULT_IS <- matrix(NA, N_dataset, 2)
```

```
ESTIMATED_Pbic <- list()
```

```
ESTIMATED_Tbic <- list()
```

```
ESTIMATED_PIS <- list()
```

```
ESTIMATED_TIS <- list()
```

```
set.seed(1)
```

```
while(n_dataset <= N_dataset){
```

```
  filename <- paste("Data_", n_dataset, ".RData", sep = "")
```

```
  load(filename)
```

```
  post_data1 <- RegularizedSCA::pre_process(my_data_list$data[, 1:J1])
```

```
  post_data2 <- RegularizedSCA::pre_process(my_data_list$data[, (J1+1):(J1+J2)])
```

```
  POST_data <- cbind(post_data1, post_data2)
```

```
  Lassosequence <- seq(0.0000001, RegularizedSCA::maxLGLasso(POST_data, Jk, R)$Lasso, length.out = 50)
```

```
  GLassosequence <- seq(0.0000001, RegularizedSCA::maxLGLasso(POST_data, Jk, R)$GLasso, length.out = 50)
```

```
result_sim_BICIS <- M2_BIC_IS(POST_data, Jk, R, LassoSequence = Lassosequence, GLassoSequence =  
GLassosequence, NRSTARTS, MaxIter)
```

```
Croux_index <- which(result_sim_BICIS$Croux == min(result_sim_BICIS$Croux), arr.ind = T)
```

```
Lasso_croux <- max(Lassosequence[Croux_index[1]]) #max() is used in case multiple lasso values are  
chosen.
```

```
GLasso_croux <- max(GLassosequence[Croux_index[2]])
```

```
final_croux <- RegularizedSCA::sparseSCA(POST_data, Jk, R, LASSO = Lasso_croux, GROUPLASSO =  
GLasso_croux, MaxIter, NRSTARTS, method = "component")
```

```
ESTIMATED_Pbic[[n_dataset]] <- final_croux$Pmatrix
```

```
ESTIMATED_Tbic[[n_dataset]] <- final_croux$Tmatrix
```

```
tuckerresult_croux <- RegularizedSCA::TuckerCoef(my_data_list$T_mat, final_croux$Tmatrix)
```

```
RESULT_BIC[n_dataset, 1] <- tuckerresult_croux$tucker_value
```

```
RESULT_BIC[n_dataset, 2] <- num_correct(my_data_list$P_mat, final_croux$Pmatrix[,  
tuckerresult_croux$perm])
```

```
IS_index <- which(result_sim_BICIS$IS == max(result_sim_BICIS$IS), arr.ind = T)
```

```
Lasso_IS <- max(Lassosequence[IS_index[1]])
```

```
GLasso_IS <- max(GLassosequence[IS_index[2]])
```

```
final_IS <- RegularizedSCA::sparseSCA(POST_data, Jk, R, LASSO = Lasso_IS, GROUPLASSO = GLasso_IS,  
MaxIter, NRSTARTS, method = "component")
```

```
ESTIMATED_PIS[[n_dataset]] <- final_IS$Pmatrix
```

```
ESTIMATED_TIS[[n_dataset]] <- final_IS$Tmatrix
```

```
tuckerresult_IS <- RegularizedSCA::TuckerCoef(my_data_list$T_mat, final_IS$Tmatrix)
```

```
RESULT_IS[n_dataset, 1] <- tuckerresult_IS$tucker_value
```

```
RESULT_IS[n_dataset, 2] <- num_correct(my_data_list$P_mat, final_IS$Pmatrix[,  
tuckerresult_IS$perm])
```

```
n_dataset <- n_dataset + 1
```

```
print(n_dataset)
}
```

```
filename <- paste("I_", I, "_J1_", J1, "_J2_", J2, "_BIC_IS", ".RData", sep = "")
```

```
save(RESULT_BIC, RESULT_IS, ESTIMATED_Pbic, ESTIMATED_Tbic, ESTIMATED_PIS, ESTIMATED_TIS, file
= filename)
```

```
### 4. Bolasso #####
```

```
n_dataset <- 1
```

```
N_dataset = 20
```

```
RESULT_BoLasso <- matrix(NA, N_dataset, 2)
```

```
ESTIMATED_Pbolasso <- list()
```

```
ESTIMATED_Tbolasso <- list()
```

```
set.seed(1)
```

```
while(n_dataset <= N_dataset){
```

```
filename <- paste("Data_", n_dataset, ".RData", sep = "")
```

```
load(filename)
```

```
post_data1 <- RegularizedSCA::pre_process(my_data_list$data[, 1:J1])
```

```
post_data2 <- RegularizedSCA::pre_process(my_data_list$data[, (J1+1):(J1+J2)])
```

```
POST_data <- cbind(post_data1, post_data2)
```

```
Lassosequence <- seq(0.0000001, RegularizedSCA::maxLGLasso(POST_data, Jk, R)$Lasso, length.out =
50)
```

```
GLassoSequence <- seq(0.0000001, RegularizedSCA::maxLGLasso(POST_data, Jk, R)$Glasso, length.out = 50)
```

```
result_sim1_Bolasso <- Bolasso_CV(POST_data, Jk, R, N_boots, LassoSequence = LassoSequence, GLassoSequence = GLassoSequence, N_cores, NRSTARTS, n_folds, MaxIter)
```

```
tuckerresult_Bolasso <- RegularizedSCA::TuckerCoef(my_data_list$T_mat, result_sim1_Bolasso$T_hat)
```

```
RESULT_BoLasso[n_dataset, 1] <- tuckerresult_Bolasso$tucker_value
```

```
RESULT_BoLasso[n_dataset, 2] <- num_correct(my_data_list$P_mat, result_sim1_Bolasso$P_hat[, tuckerresult_Bolasso$perm])
```

```
ESTIMATED_Pbolasso[[n_dataset]] <- result_sim1_Bolasso$P_hat
```

```
ESTIMATED_Tbolasso[[n_dataset]] <- result_sim1_Bolasso$T_hat
```

```
n_dataset <- n_dataset + 1
```

```
print(n_dataset)
```

```
}
```

```
filename <- paste("I_", I, "_J1_", J1, "_J2_", J2, "_BOLASSO", ".RData", sep = "")
```

```
save(RESULT_BoLasso, ESTIMATED_Pbolasso, ESTIMATED_Tbolasso, file = filename)
```

```
### 5. Stability selection #####
```

```
n_dataset <- 1
```

```
N_dataset = 20
```

```
RESULT_StabS <- matrix(NA, N_dataset, 2)
```

```
ESTIMATED_PStabS <- list()
```

```
ESTIMATED_TStabS <- list()
```

```

set.seed(1)
while(n_dataset <= N_dataset){

  filename <- paste("Data_", n_dataset, ".RData", sep = "")
  load(filename)

  n_loading <- sum(my_data_list$P_mat !=0) # note! in reality we dont know the number of non-zero
  loadings! We just want to see if we know n_loading a priori, can the method generates good results?

  post_data1 <- RegularizedSCA::pre_process(my_data_list$data[, 1:J1])
  post_data2 <- RegularizedSCA::pre_process(my_data_list$data[, (J1+1):(J1+J2)])
  POST_data <- cbind(post_data1, post_data2)

  LassoSequence = exp(seq(from = log(0.00000001), to = log(RegularizedSCA::maxLGLasso(POST_data, Jk,
R)$Lasso), length.out = 500)) #we use Lasso only

  result_sim1_StabS <- M4_StabSelection(POST_data, Jk, R, LassoSequence = LassoSequence, N_loading
= n_loading, Thr = .6, NRSTARTS, N_cores, n_folds, MaxIter)

  tuckerresult_StabS <- RegularizedSCA::TuckerCoef(my_data_list$T_mat, result_sim1_StabS$T_hat)
  RESULT_StabS[n_dataset, 1] <- tuckerresult_StabS$tucker_value
  RESULT_StabS[n_dataset, 2] <- num_correct(my_data_list$P_mat, result_sim1_StabS$P_hat[,
tuckerresult_StabS$perm])
  ESTIMATED_PStabS[[n_dataset]] <- result_sim1_StabS$P_hat
  ESTIMATED_TStabS[[n_dataset]] <- result_sim1_StabS$T_hat

  n_dataset <- n_dataset + 1

  print(n_dataset)
}

```



```
filename <- paste("I_", I, "_J1_", J1, "_J2_", J2, "_Stability", ".RData", sep = "")
save(RESULT_StabS, ESTIMATED_PStabS, ESTIMATED_TStabS, file = filename)
```

9. simulation: 4 blocks

```
library(devtools)
install_github("ZhengguoGu/RegularizedSCA")
library(RegularizedSCA)
library(foreach)
library(snow)
library(doSNOW)
library(doRNG)
```

```
##### LOAD functions #####
```

```
#please load the following functions first
```

- #1. M1\_repeatedDoubleCV.R
- #2. M2\_BIC12andIS.R
- #3. M3\_Bolasso.R
- #4. M4\_StabSelection.R

```
#####  
#####
```

```
# StrucSCA_withIndex() estimates T and P, given the pre-defined structure of P
```

```
# This is used in M3_Bolasso.R and M4_StabSelection.R
```

```
#####  
#####
```

```
StrucSCA_withIndex <- function (DATA, Jk, R, P_indexset, MaxIter) {
```

```
# note that this function is needed for M3_Bolasso.R and M4_StabSelection.R
```

```
DATA <- data.matrix(DATA)
```

```
I_Data <- dim(DATA)[1]
```

```
sumJk <- dim(DATA)[2]
```

```
eps <- 10^(-12)
```

```
if (missing(MaxIter)) {
```

```
  MaxIter <- 300
```

```
}
```

```
P <- matrix(stats::rnorm(sumJk * R), nrow = sumJk, ncol = R)
```

```
P[P_indexset == 0] <- 0
```

```
Pt <- t(P)
```

```
residual <- sum(DATA^2)
```

```
Lossc <- residual
```

```
conv <- 0
```

```
iter <- 1
```

```
Lossvec <- array()
```

```
while (conv == 0) {
```

```
  ##### the block #####
```

```
  A <- Pt %*% t(DATA)
```

```
  SVD_DATA <- svd(A, R, R)
```

```
  Tmat <- SVD_DATA$v %*% t(SVD_DATA$u)
```

```
  #####
```

```
  Lossu <- sum((DATA - Tmat %*% Pt)^2)
```

```

P <- t(DATA) %*% Tmat
P[P_indexset == 0] <- 0
Pt <- t(P)

Lossu2 <- sum((DATA - Tmat %*% Pt)^2)

if (abs(Lossc - Lossu) < 10^(-9)) {
  Loss <- Lossu
  residual <- Lossu2
  P[abs(P) <= 2 * eps] <- 0
  conv <- 1
}
else if (iter > MaxIter) {
  Loss <- Lossu
  residual <- Lossu2
  P[abs(P) <= 2 * eps] <- 0
  conv <- 1
}
Lossvec[iter] <- Lossu
iter <- iter + 1
Lossc <- Lossu2
}
return_varselect <- list()
return_varselect$Pmatrix <- P
return_varselect$Tmatrix <- Tmat
return_varselect$Loss <- Loss
return_varselect$Lossvec <- Lossvec
#return_varselect$Residual <- residual

```

```
return(return_vareselect)
}
```

```
#####
#####
```

```
# Calculate the number of variables AND zero-loadings correctly selected
```

```
# Note: this function is about the total number of variables correctedly selected and zeros correctly retained
```

```
#
```

```
# for the number of variables correctly selected, and the number of zero loadings correctly identified, please see "sumarizing results.R"
```

```
#####
#####
```

```
num_correct <- function (TargetP, EstimatedP){
```

```
total_vnumber <- dim(TargetP)[1] * dim(TargetP)[2]
```

```
TargetP[which(TargetP != 0)] <- 1
```

```
sum_select <- sum(TargetP)
```

```
sum_zero <- total_vnumber - sum_select
```

```
EstimatedP[which(EstimatedP != 0)] <- 1
```

```
total_correct <- sum(TargetP == EstimatedP) # this is the total number of variables correctedly selected and zeros correctly retained
```

```
prop_correct <- total_correct/total_vnumber
```

```
return(prop_correct)
```

```
}
```

```
#####  
#####
```

```
#####  
#####
```

```
#####  
#####
```

```
####
```

```
#### Simulations
```

```
####
```

```
#####  
#####
```

```
N_cores <- 6 # number of cores for parallel computing (for 4blocks, I used 6 cores on blade server)
```

```
I <- 20
```

```
J1 <- 120
```

```
J2 <- 30
```

```
J3 <- 40
```

```
J4 <- 10
```

```
Jk <- c(J1, J2, J3, J4)
```

```
R <- 3
```

```
NRSTARTS <- 2 # #random starts
```

```
n_rep = 50 # #repetition for rdCV
```

```
n_seg = 2 # #segments for rdCV
```

```
N_boots = 50 # #repetition for BoLasso
```

```

nfolde = 5 # 5-fold CV

MaxIter = 300 # #maximum iterations

### 1. benchmark CV

set.seed(1)

n_dataset <- 1

N_dataset = 20

RESULT_BenchmarkCV <- matrix(NA, N_dataset, 2)

ESTIMATED_P <- list()

ESTIMATED_T <- list()

while(n_dataset <= N_dataset){

  filename <- paste("Data_", n_dataset, ".RData", sep = "")

  load(filename)

  post_data1 <- RegularizedSCA::pre_process(my_data_list$data[, 1:J1])
  post_data2 <- RegularizedSCA::pre_process(my_data_list$data[, (J1+1):(J1+J2)])
  post_data3 <- RegularizedSCA::pre_process(my_data_list$data[, (J1+J2+1):(J1+J2+J3)])
  post_data4 <- RegularizedSCA::pre_process(my_data_list$data[, (J1+J2+J3+1):(J1+J2+J3+J4)])
  POST_data <- cbind(post_data1, post_data2, post_data3, post_data4)

  Lassosequence <- seq(0.0000001, RegularizedSCA::maxLGLasso(POST_data, Jk, R)$Lasso, length.out =
50)

  GLassosequence <- seq(0.0000001, RegularizedSCA::maxLGLasso(POST_data, Jk, R)$GLasso, length.out =
50)

  result_sim1_BM <- RegularizedSCA::cv_sparseSCA(POST_data, Jk, R, MaxIter = MaxIter, NRSTARTS,
Lassosequence, GLassosequence, nfolde, method = "component")

  tuckerresult <- RegularizedSCA::TuckerCoef(my_data_list$T_mat, result_sim1_BM$T_hat)

  RESULT_BenchmarkCV[n_dataset, 1] <- tuckerresult$tucker_value

```

```
RESULT_BenchmarkCV[n_dataset, 2] <- num_correct(my_data_list$P_mat, result_sim1_BM$P_hat[,
tuckerresult$perm])
```

```
ESTIMATED_P[[n_dataset]] <- result_sim1_BM$P_hat
ESTIMATED_T[[n_dataset]] <- result_sim1_BM$T_hat
n_dataset <- n_dataset + 1
}
```

```
filename <- paste("1_benchmark_CV", ".RData", sep = "")
save(RESULT_BenchmarkCV, ESTIMATED_P, ESTIMATED_T, file = filename)
```

```
### 2. repeated Double CV #####
```

```
n_dataset <- 1
```

```
N_dataset = 20
```

```
RESULT_rdCV <- matrix(NA, N_dataset, 2)
```

```
ESTIMATED_PrdCV <- list()
```

```
ESTIMATED_TrdCV <- list()
```

```
set.seed(1)
```

```
while(n_dataset <= N_dataset){
```

```
  filename <- paste("Data_", n_dataset, ".RData", sep = "")
```

```
  load(filename)
```

```
  post_data1 <- RegularizedSCA::pre_process(my_data_list$data[, 1:J1])
```

```
  post_data2 <- RegularizedSCA::pre_process(my_data_list$data[, (J1+1):(J1+J2)])
```

```
  post_data3 <- RegularizedSCA::pre_process(my_data_list$data[, (J1+J2+1):(J1+J2+J3)])
```

```

post_data4 <- RegularizedSCA::pre_process(my_data_list$data[, (J1+J2+J3+1):(J1+J2+J3+J4)])
POST_data <- cbind(post_data1, post_data2, post_data3, post_data4)

Lassosequence <- seq(0.0000001, RegularizedSCA::maxLGLasso(POST_data, Jk, R)$Lasso, length.out =
50)

GLassosequence <- seq(0.0000001, RegularizedSCA::maxLGLasso(POST_data, Jk, R)$Glasso, length.out =
50)

result_sim1_RDCV <- M1_repeatedDoubleCV(POST_data, R, Jk, N_cores, Lassosequence,
GLassosequence, n_rep, n_seg, NRSTARTS, nfolds, MaxIter)

temp_lasso <- as.data.frame(result_sim1_RDCV$Lasso)
temp_lasso$Var1 <- sort(as.numeric(levels(temp_lasso$Var1)))
LASSO <- max(temp_lasso[temp_lasso[,2] == max(temp_lasso[,2]),1]) #the first max ensures that the
largest Lasso value is chosen, in case more than one lasso value is recommended by
M1_repeatedDoubleCV
temp_glasso <- as.data.frame(result_sim1_RDCV$GroupLasso)
temp_glasso$Var1 <- sort(as.numeric(levels(temp_glasso$Var1)))
GLASSO <- max(temp_glasso[temp_glasso[,2] == max(temp_glasso[,2]),1])

final_RDCV <- RegularizedSCA::sparseSCA(POST_data, Jk, R, LASSO = LASSO, GROUPLASSO = GLASSO,
MaxIter, NRSTARTS, method = "component")

tuckerresult_RDCV <- RegularizedSCA::TuckerCoef(my_data_list$T_mat, final_RDCV$Tmatrix)
RESULT_rdCV[n_dataset, 1] <- tuckerresult_RDCV$tucker_value
RESULT_rdCV[n_dataset, 2] <- num_correct(my_data_list$P_mat, final_RDCV$Pmatrix[,
tuckerresult_RDCV$perm])

ESTIMATED_PrDCV[[n_dataset]] <- final_RDCV$Pmatrix
ESTIMATED_TrDCV[[n_dataset]] <- final_RDCV$Tmatrix

```



```

n_dataset <- n_dataset + 1

print(n_dataset)
}

filename <- paste("2_RepeatedDCV", ".RData", sep = "")
save(RESULT_rdCV, ESTIMATED_PrCV, ESTIMATED_TrCV, file = filename)

### 3. BIC and IS #####
n_dataset <- 1
N_dataset = 20
RESULT_BIC <- matrix(NA, N_dataset, 2)
RESULT_IS <- matrix(NA, N_dataset, 2)
ESTIMATED_Pbic <- list()
ESTIMATED_Tbic <- list()
ESTIMATED_PIS <- list()
ESTIMATED_TIS <- list()

set.seed(1)
while(n_dataset <= N_dataset){
  filename <- paste("Data_", n_dataset, ".RData", sep = "")
  load(filename)

  post_data1 <- RegularizedSCA::pre_process(my_data_list$data[, 1:J1])
  post_data2 <- RegularizedSCA::pre_process(my_data_list$data[, (J1+1):(J1+J2)])
  post_data3 <- RegularizedSCA::pre_process(my_data_list$data[, (J1+J2+1):(J1+J2+J3)])
  post_data4 <- RegularizedSCA::pre_process(my_data_list$data[, (J1+J2+J3+1):(J1+J2+J3+J4)])
}

```

```

POST_data <- cbind(post_data1, post_data2, post_data3, post_data4)

Lassosequence <- seq(0.0000001, RegularizedSCA::maxLGLasso(POST_data, Jk, R)$Lasso, length.out =
50)

GLassosequence <- seq(0.0000001, RegularizedSCA::maxLGLasso(POST_data, Jk, R)$GLasso, length.out =
50)

result_sim_BICIS <- M2_BIC_IS(POST_data, Jk, R, LassoSequence = Lassosequence, GLassoSequence =
GLassosequence, NRSTARTS, MaxIter)

Croux_index <- which(result_sim_BICIS$Croux == min(result_sim_BICIS$Croux), arr.ind = T)

Lasso_croux <- max(Lassosequence[Croux_index[1]]) #max() is used in case multiple lasso values are
chosen.

GLasso_croux <- max(GLassosequence[Croux_index[2]])

final_croux <- RegularizedSCA::sparseSCA(POST_data, Jk, R, LASSO = Lasso_croux, GROUPLASSO =
GLasso_croux, MaxIter, NRSTARTS, method = "component")

ESTIMATED_Pbic[[n_dataset]] <- final_croux$Pmatrix
ESTIMATED_Tbic[[n_dataset]] <- final_croux$Tmatrix

tuckerresult_croux <- RegularizedSCA::TuckerCoef(my_data_list$T_mat, final_croux$Tmatrix)

RESULT_BIC[n_dataset, 1] <- tuckerresult_croux$tucker_value

RESULT_BIC[n_dataset, 2] <- num_correct(my_data_list$P_mat, final_croux$Pmatrix[,
tuckerresult_croux$perm])

IS_index <- which(result_sim_BICIS$IS == max(result_sim_BICIS$IS), arr.ind = T)

Lasso_IS <- max(Lassosequence[IS_index[1]])

GLasso_IS <- max(GLassosequence[IS_index[2]])

final_IS <- RegularizedSCA::sparseSCA(POST_data, Jk, R, LASSO = Lasso_IS, GROUPLASSO = GLasso_IS,
MaxIter, NRSTARTS, method = "component")

ESTIMATED_PIS[[n_dataset]] <- final_IS$Pmatrix

```

```

ESTIMATED_TIS[[n_dataset]] <- final_IS$Tmatrix
tuckerresult_IS <- RegularizedSCA::TuckerCoef(my_data_list$T_mat, final_IS$Tmatrix)
RESULT_IS[n_dataset, 1] <- tuckerresult_IS$tucker_value
RESULT_IS[n_dataset, 2] <- num_correct(my_data_list$P_mat, final_IS$Pmatrix[,
tuckerresult_IS$perm])

n_dataset <- n_dataset + 1

print(n_dataset)
}

filename <- paste("3_BIC_IS", ".RData", sep = "")
save(RESULT_BIC, RESULT_IS, ESTIMATED_Pbic, ESTIMATED_Tbic, ESTIMATED_PIS, ESTIMATED_TIS, file
= filename)

```

```

### 4. Bolasso #####

```

```

n_dataset <- 1
N_dataset = 20
RESULT_BoLasso <- matrix(NA, N_dataset, 2)
ESTIMATED_Pbolasso <- list()
ESTIMATED_Tbolasso <- list()

set.seed(1)
while(n_dataset <= N_dataset){

filename <- paste("Data_", n_dataset, ".RData", sep = "")
load(filename)

```

```

post_data1 <- RegularizedSCA::pre_process(my_data_list$data[, 1:J1])
post_data2 <- RegularizedSCA::pre_process(my_data_list$data[, (J1+1):(J1+J2)])
post_data3 <- RegularizedSCA::pre_process(my_data_list$data[, (J1+J2+1):(J1+J2+J3)])
post_data4 <- RegularizedSCA::pre_process(my_data_list$data[, (J1+J2+J3+1):(J1+J2+J3+J4)])
POST_data <- cbind(post_data1, post_data2, post_data3, post_data4)

LassoSequence <- seq(0.0000001, RegularizedSCA::maxLGLasso(POST_data, Jk, R)$Lasso, length.out =
50)
GLassoSequence <- seq(0.0000001, RegularizedSCA::maxLGLasso(POST_data, Jk, R)$GLasso, length.out =
50)

result_sim1_Bolasso <- Bolasso_CV(POST_data, Jk, R, N_boots, LassoSequence = LassoSequence,
GLassoSequence = GLassoSequence, N_cores, NRSTARTS, nfolds, MaxIter)

tuckerresult_Bolasso <- RegularizedSCA::TuckerCoef(my_data_list$T_mat, result_sim1_Bolasso$T_hat)
RESULT_BoLasso[n_dataset, 1] <- tuckerresult_Bolasso$tucker_value
RESULT_BoLasso[n_dataset, 2] <- num_correct(my_data_list$P_mat, result_sim1_Bolasso$P_hat[,
tuckerresult_Bolasso$perm])
ESTIMATED_Pbolasso[[n_dataset]] <- result_sim1_Bolasso$P_hat
ESTIMATED_Tbolasso[[n_dataset]] <- result_sim1_Bolasso$T_hat

n_dataset <- n_dataset + 1

print(n_dataset)
}

filename <- paste("4_BOLASSO", ".RData", sep = "")
save(RESULT_BoLasso, ESTIMATED_Pbolasso, ESTIMATED_Tbolasso, file = filename)

```

```
### 5. Stability selection #####
```

```
n_dataset <- 1
```

```
N_dataset = 20
```

```
RESULT_StabS <- matrix(NA, N_dataset, 2)
```

```
ESTIMATED_PStabS <- list()
```

```
ESTIMATED_TStabS <- list()
```

```
set.seed(1)
```

```
while(n_dataset <= N_dataset){
```

```
  filename <- paste("Data_", n_dataset, ".RData", sep = "")
```

```
  load(filename)
```

```
  n_loading <- sum(my_data_list$P_mat != 0) # note! in reality we dont know the number of non-zero loadings! We just want to see if we know n_loading a priori, can the method generates good results?
```

```
  post_data1 <- RegularizedSCA::pre_process(my_data_list$data[, 1:J1])
```

```
  post_data2 <- RegularizedSCA::pre_process(my_data_list$data[, (J1+1):(J1+J2)])
```

```
  post_data3 <- RegularizedSCA::pre_process(my_data_list$data[, (J1+J2+1):(J1+J2+J3)])
```

```
  post_data4 <- RegularizedSCA::pre_process(my_data_list$data[, (J1+J2+J3+1):(J1+J2+J3+J4)])
```

```
  POST_data <- cbind(post_data1, post_data2, post_data3, post_data4)
```

```
  LassoSequence = exp(seq(from = log(0.00000001), to = log(RegularizedSCA::maxLGLasso(POST_data, Jk, R)$Lasso), length.out = 500)) #we use Lasso only
```

```
  result_sim1_StabS <- M4_StabSelection(POST_data, Jk, R, LassoSequence = LassoSequence, N_loading = n_loading, Thr = .6, NRSTARTS, N_cores, nfold, MaxIter)
```

```
  tuckerresult_StabS <- RegularizedSCA::TuckerCoef(my_data_list$T_mat, result_sim1_StabS$T_hat)
```

```

RESULT_StabS[n_dataset, 1] <- tuckerresult_StabS$tucker_value
RESULT_StabS[n_dataset, 2] <- num_correct(my_data_list$P_mat, result_sim1_StabS$P_hat[,
tuckerresult_StabS$perm])
ESTIMATED_PStabS[[n_dataset]] <- result_sim1_StabS$P_hat
ESTIMATED_TStabS[[n_dataset]] <- result_sim1_StabS$T_hat

```

```
n_dataset <- n_dataset + 1
```

```

print(n_dataset)
}

```

```

filename <- paste("5_Stability", ".RData", sep = "")
save(RESULT_StabS, ESTIMATED_PStabS, ESTIMATED_TStabS, file = filename)

```

10. summarizing results (plots etc): 2 blocks

```

#####
##### summarizing results of the simulation study #####
##### (for revision) #####
#####

```

```

library(ggplot2)
library(reshape2)
library(gridExtra)

```

```

##### PART 1a: Boxplots (2 data blocks), variable correctly selected and zeros correctly
identified #####

```

```
# I. summarizing data;
```

```

# Sim_1 0.5% noise and 30% zero #####
#(note: load data by hand)
tucker_result_Sim1 <- cbind(RESULT_BenchmarkCV[,1],
    RESULT_rdCV[, 1],
    RESULT_BIC[,1],
    RESULT_IS[,1],
    RESULT_BoLasso[,1],
    RESULT_StabS[,1],
    "0.5% noise, 30% zeros")
colnames(tucker_result_Sim1) <- c("CV", "RdCV", "BIC", "IS", "BoLasso", "Stab. selection", "condition")

PL_Sim1 <- cbind(RESULT_BenchmarkCV[,2],
    RESULT_rdCV[, 2],
    RESULT_BIC[,2],
    RESULT_IS[,2],
    RESULT_BoLasso[,2],
    RESULT_StabS[,2],
    "0.5% noise, 30% zeros")
colnames(PL_Sim1) <- c("CV", "RdCV", "BIC", "IS", "BoLasso", "Stab. selection", "condition")
save(file = "sim1.RData", tucker_result_Sim1, PL_Sim1)
#####

# Sim_2 0.5% noise and 50% zero #####
#(note: load data by hand)
tucker_result_Sim2 <- cbind(RESULT_BenchmarkCV[,1],
    RESULT_rdCV[, 1],
    RESULT_BIC[,1],
    RESULT_IS[,1],

```

```
        RESULT_BoLasso[,1],
        RESULT_StabS[,1],
        "0.5% noise, 50% zeros")
colnames(tucker_result_Sim2) <- c("CV", "RdCV", "BIC", "IS", "BoLasso", "Stab. selection", "condition")
```

```
PL_Sim2 <- cbind(RESULT_BenchmarkCV[,2],
                RESULT_rdCV[, 2],
                RESULT_BIC[,2],
                RESULT_IS[,2],
                RESULT_BoLasso[,2],
                RESULT_StabS[,2],
                "0.5% noise, 50% zeros")
```

```
colnames(PL_Sim2) <- c("CV", "RdCV", "BIC", "IS", "BoLasso", "Stab. selection", "condition")
```

```
save(file = "sim2.RData", tucker_result_Sim2, PL_Sim2)
```

```
#####
```

```
# Sim_3 30% noise and 30% zero #####
```

```
 #(note: load data by hand)
```

```
tucker_result_Sim3 <- cbind(RESULT_BenchmarkCV[,1],
                            RESULT_rdCV[, 1],
                            RESULT_BIC[,1],
                            RESULT_IS[,1],
                            RESULT_BoLasso[,1],
                            RESULT_StabS[,1],
                            "30% noise, 30% zeros")
```

```
colnames(tucker_result_Sim3) <- c("CV", "RdCV", "BIC", "IS", "BoLasso", "Stab. selection", "condition")
```

```
PL_Sim3 <- cbind(RESULT_BenchmarkCV[,2],
                RESULT_rdCV[, 2],
```



```

RESULT_BIC[2],
RESULT_IS[2],
RESULT_BoLasso[2],
RESULT_StabS[2],
"30% noise, 30% zeros")
colnames(PL_Sim3) <- c("CV", "RdCV", "BIC", "IS", "BoLasso", "Stab. selection", "condition")
save(file = "sim3.RData", tucker_result_Sim3, PL_Sim3)
#####

# Sim_4 30% noise and 50% zero #####
#(note: load data by hand)
tucker_result_Sim4 <- cbind(RESULT_BenchmarkCV[,1],
    RESULT_rdCV[ 1],
    RESULT_BIC[,1],
    RESULT_IS[,1],
    RESULT_BoLasso[,1],
    RESULT_StabS[,1],
    "30% noise, 50% zeros")
colnames(tucker_result_Sim4) <- c("CV", "RdCV", "BIC", "IS", "BoLasso", "Stab. selection", "condition")

PL_Sim4 <- cbind(RESULT_BenchmarkCV[,2],
    RESULT_rdCV[ 2],
    RESULT_BIC[,2],
    RESULT_IS[,2],
    RESULT_BoLasso[,2],
    RESULT_StabS[,2],
    "30% noise, 50% zeros")
colnames(PL_Sim4) <- c("CV", "RdCV", "BIC", "IS", "BoLasso", "Stab. selection", "condition")
save(file = "sim4.RData", tucker_result_Sim4, PL_Sim4)

```

```
#####
```

```
load("sim1.RData")
```

```
load("sim2.RData")
```

```
load("sim3.RData")
```

```
load("sim4.RData")
```

```
PL <- rbind(PL_Sim1, PL_Sim2, PL_Sim3, PL_Sim4)
```

```
PL_final <- data.frame(apply(PL[, 1:6], 2, as.numeric))
```

```
PL_final$condition <- PL[, 7]
```

```
colnames(PL_final)[c(5, 6)] <- c("BL", "SS")
```

```
dat_temp <- melt(PL_final, id.vars="condition", measure.vars=c("CV", "RdCV", "BIC", "IS", "BL", "SS"))
```

```
p <- ggplot(dat_temp, aes(x = variable, y = value)) +
```

```
  geom_boxplot()+
```

```
  scale_y_continuous(name = "Proportion of loadings correctedly selected", limits = c(0, 1)) +
```

```
  scale_x_discrete(name = "Variable selection methods") +
```

```
  ggtitle("I=80, J1=40, J2=10") + #do not forget to manually change this.
```

```
  theme_bw() +
```

```
  theme(plot.title = element_text(size = 14, family = "Tahoma", face = "bold"),
```

```
        text = element_text(size = 14, family = "Tahoma"),
```

```
        axis.title = element_text(face="bold"),
```

```
        axis.text.x=element_text(size = 12))+
```

```
  facet_grid(. ~ condition)
```

```
p
```

```
Tucker_results <- rbind(tucker_result_Sim1, tucker_result_Sim2, tucker_result_Sim3,  
tucker_result_Sim4)
```

```

Tucker_final<- data.frame(apply(Tucker_results[, 1:6], 2, as.numeric))
Tucker_final$condition <- Tucker_results[, 7]
colnames(Tucker_final)[c(5, 6)] <- c("BL", "SS")
dat_temp <- melt(Tucker_final,id.vars="condition", measure.vars=c("CV", "RdCV", "BIC", "IS", "BL",
"SS"))

p_tucker <- ggplot(dat_temp, aes(x = variable, y = value)) +
  geom_boxplot()+
  scale_y_continuous(name = "Tucker congruence", limits = c(0, 1)) +
  scale_x_discrete(name = "Variable selection methods") +
  ggtitle("I=80, J1=40, J2=10") + #do not forget to manually change this.
  theme_bw() +
  theme(plot.title = element_text(size = 14, family = "Tahoma", face = "bold"),
        text = element_text(size = 14, family = "Tahoma"),
        axis.title = element_text(face="bold"),
        axis.text.x=element_text(size = 12))+
  facet_grid(. ~ condition)

p_tucker
#####
#####

##### PART 1b: boxplot (2 data blocks), seperately for variable correctly selected and for
zeros corrected identified #####

# (authors' comment: first we have to record the number of non-zero loadings that are correctly
identified

# and also the number of zero loadings that are correctly identified.)

numNo0_correct <- function(MATa, MATb){
  num_corr <- sum((MATa != 0) & (MATb != 0))
  return(num_corr)
}

```

```

}
num0_correct <- function(MATa, MATb){
  num_corr <- sum((MATa == 0) & (MATb == 0))
  return(num_corr)
}

ratio_nonzero_zero <- function(file_names){

  #file_names: it starts with "I_20_J1_120_J2_30", or something like this.
  fnames <- paste(file_names, "_benchmark_CV.RData", sep = "")
  load(fnames)
  fnames <- paste(file_names, "_BIC_IS.RData", sep = "")
  load(fnames)
  fnames <- paste(file_names, "_BOLASSO.RData", sep = "")
  load(fnames)
  fnames <- paste(file_names, "_RepeatedDCV.RData", sep = "")
  load(fnames)
  fnames <- paste(file_names, "_Stability.RData", sep = "")
  load(fnames)

  ###
  n_dataset <- 1

  numNo0_true <- array()
  num0_true <- array()

  numNo0 crt_Benchmark <- array() #number of non-zero loadings
  num0_Benchmark <- array()
  numNo0 crt_RdCV <- array()

```

```

num0_RdCV <- array()
numNo0_crt_BIC <- array()
num0_BIC <- array()
numNo0_crt_IS <- array()
num0_IS <- array()
numNo0_crt_Bolasso <- array()
num0_Bolasso <- array()
numNo0_crt_Stab <- array()
num0_Stab <- array()

while(n_dataset <= 20){

  filename <- paste("Data_", n_dataset, ".RData", sep = "")
  load(filename)

  numNo0_true[n_dataset] <- sum(my_data_list$P_mat !=0)
  num0_true[n_dataset] <- sum(my_data_list$P_mat ==0)

  #BenchmarkCV
  tuckerresult <- RegularizedSCA::TuckerCoef(my_data_list$T_mat, ESTIMATED_T[[n_dataset]])
  numNo0_crt_Benchmark[n_dataset]<- numNo0_correct(ESTIMATED_P[[n_dataset]][,
tuckerresult$perm], my_data_list$P_mat )
  num0_Benchmark[n_dataset] <- num0_correct(ESTIMATED_P[[n_dataset]][, tuckerresult$perm],
my_data_list$P_mat )

  #RdCV
  tuckerresult <- RegularizedSCA::TuckerCoef(my_data_list$T_mat, ESTIMATED_TrDCV[[n_dataset]])
  numNo0_crt_RdCV[n_dataset] <- numNo0_correct(ESTIMATED_PrdCV[[n_dataset]][,
tuckerresult$perm], my_data_list$P_mat )

```

```
num0_RdCV[n_dataset]<- num0_correct(ESTIMATED_PrdCV[[n_dataset]][, tuckerresult$perm],  
my_data_list$P_mat )
```

```
#BIC
```

```
tuckerresult <- RegularizedSCA::TuckerCoef(my_data_list$T_mat, ESTIMATED_Tbic[[n_dataset]])
```

```
numNo0_crt_BIC[n_dataset] <- numNo0_correct(ESTIMATED_Pbic[[n_dataset]][, tuckerresult$perm],  
my_data_list$P_mat )
```

```
num0_BIC[n_dataset] <- num0_correct(ESTIMATED_Pbic[[n_dataset]][, tuckerresult$perm],  
my_data_list$P_mat )
```

```
#IS
```

```
tuckerresult <- RegularizedSCA::TuckerCoef(my_data_list$T_mat, ESTIMATED_TIS[[n_dataset]])
```

```
numNo0_crt_IS[n_dataset] <- numNo0_correct(ESTIMATED_PIS[[n_dataset]][, tuckerresult$perm],  
my_data_list$P_mat )
```

```
num0_IS[n_dataset] <- num0_correct(ESTIMATED_PIS[[n_dataset]][, tuckerresult$perm],  
my_data_list$P_mat )
```

```
#Bolasso
```

```
tuckerresult <- RegularizedSCA::TuckerCoef(my_data_list$T_mat, ESTIMATED_Tbolasso[[n_dataset]])
```

```
numNo0_crt_Bolasso[n_dataset] <- numNo0_correct(ESTIMATED_Pbolasso[[n_dataset]][,  
tuckerresult$perm], my_data_list$P_mat )
```

```
num0_Bolasso[n_dataset] <- num0_correct(ESTIMATED_Pbolasso[[n_dataset]][, tuckerresult$perm],  
my_data_list$P_mat )
```

```
#Stability Selection
```

```
tuckerresult <- RegularizedSCA::TuckerCoef(my_data_list$T_mat, ESTIMATED_TStabS[[n_dataset]])
```

```
numNo0_crt_Stab[n_dataset] <- numNo0_correct(ESTIMATED_PStabS[[n_dataset]][,  
tuckerresult$perm], my_data_list$P_mat )
```

```
num0_Stab[n_dataset] <- num0_correct(ESTIMATED_PStabS[[n_dataset]][, tuckerresult$perm],  
my_data_list$P_mat )
```

```
n_dataset <- n_dataset + 1
```

```
}
```

```
Ratio_numNo0_crt_Benchmark <- numNo0_crt_Benchmark / numNo0_true
```

```
Ratio_num0_Benchmark <- num0_Benchmark / num0_true
```

```
Ratio_numNo0_crt_RdCV <- numNo0_crt_RdCV / numNo0_true
```

```
Ratio_num0_RdCV <- num0_RdCV / num0_true
```

```
Ratio_numNo0_crt_BIC <- numNo0_crt_BIC / numNo0_true
```

```
Ratio_num0_BIC <- num0_BIC / num0_true
```

```
Ratio_numNo0_crt_IS <- numNo0_crt_IS / numNo0_true
```

```
Ratio_num0_IS <- num0_IS / num0_true
```

```
Ratio_numNo0_crt_Bolasso <- numNo0_crt_Bolasso / numNo0_true
```

```
Ratio_num0_Bolasso <- num0_Bolasso / num0_true
```

```
Ratio_numNo0_crt_Stab <- numNo0_crt_Stab / numNo0_true
```

```
Ratio_num0_Stab <- num0_Stab / num0_true
```

```
result <- cbind(Ratio_numNo0_crt_Benchmark, Ratio_numNo0_crt_RdCV, Ratio_numNo0_crt_BIC,  
Ratio_numNo0_crt_IS, Ratio_numNo0_crt_Bolasso, Ratio_numNo0_crt_Stab,
```

```
Ratio_num0_Benchmark, Ratio_num0_RdCV, Ratio_num0_BIC, Ratio_num0_IS,  
Ratio_num0_Bolasso, Ratio_num0_Stab)
```

```
return(result)
```

```
}
```

```
### folder 2block_I20_J120_30
```

```
file_heading <- "I_20_J1_120_J2_30"
```

```
# note, change directory to the correct subfolder: for example, for "Sim_1 0.5% noise and 30% zero"  
(see below), change directory to the 0_005noise_0_3zeros folder
```

```
# Sim_1 0.5% noise and 30% zero #####
```

```
result_sim1 <- ratio_nonzero_zero(file_heading)
```

```
save(result_sim1, file = "seperate_sim1.RData")
```

```
# Sim_2 0.5% noise and 50% zero #####
```

```
result_sim2 <- ratio_nonzero_zero(file_heading)
save(result_sim2, file = "seperate_sim2.RData")
# Sim_3 30% noise and 30% zero #####
result_sim3 <- ratio_nonzero_zero(file_heading)
save(result_sim3, file = "seperate_sim3.RData")
# Sim_4 30% noise and 50% zero #####
result_sim4 <- ratio_nonzero_zero(file_heading)
save(result_sim4, file = "seperate_sim4.RData")
```

```
### folder 2block_I20_J40_10
file_heading <- "I_20_J1_40_J2_10"
# Sim_1 0.5% noise and 30% zero #####
result_sim1 <- ratio_nonzero_zero(file_heading)
save(result_sim1, file = "seperate_sim1.RData")
# Sim_2 0.5% noise and 50% zero #####
result_sim2 <- ratio_nonzero_zero(file_heading)
save(result_sim2, file = "seperate_sim2.RData")
# Sim_3 30% noise and 30% zero #####
result_sim3 <- ratio_nonzero_zero(file_heading)
save(result_sim3, file = "seperate_sim3.RData")
# Sim_4 30% noise and 50% zero #####
result_sim4 <- ratio_nonzero_zero(file_heading)
save(result_sim4, file = "seperate_sim4.RData")
```

```
### folder 2block_I80_J40_10
file_heading <- "I_80_J1_40_J2_10"
# Sim_1 0.5% noise and 30% zero #####
result_sim1 <- ratio_nonzero_zero(file_heading)
save(result_sim1, file = "seperate_sim1.RData")
```



```

# Sim_2 0.5% noise and 50% zero #####
result_sim2 <- ratio_nonzero_zero(file_heading)
save(result_sim2, file = "seperate_sim2.RData")

# Sim_3 30% noise and 30% zero #####
result_sim3 <- ratio_nonzero_zero(file_heading)
save(result_sim3, file = "seperate_sim3.RData")

# Sim_4 30% noise and 50% zero #####
result_sim4 <- ratio_nonzero_zero(file_heading)
save(result_sim4, file = "seperate_sim4.RData")

##### boxplots
library(ggplot2)
library(reshape2)
library(gridExtra)

PL1_sim1 <- data.frame(result_sim1[, 1:6]) #variables correctly identified
PL1_sim1$condition <- "0.5% noise and 30% zero"
PL2_sim1 <- data.frame(result_sim1[, 7:12]) #zeros correctly identified
PL2_sim1$condition <- "0.5% noise and 30% zero"

PL1_sim2 <- data.frame(result_sim2[, 1:6]) #variables correctly identified
PL1_sim2$condition <- "0.5% noise and 50% zero"
PL2_sim2 <- data.frame(result_sim2[, 7:12]) #zeros correctly identified
PL2_sim2$condition <- "0.5% noise and 50% zero"

PL1_sim3 <- data.frame(result_sim3[, 1:6]) #variables correctly identified
PL1_sim3$condition <- "30% noise and 30% zero"
PL2_sim3 <- data.frame(result_sim3[, 7:12]) #zeros correctly identified
PL2_sim3$condition <- "30% noise and 30% zero"

PL1_sim4 <- data.frame(result_sim4[, 1:6]) #variables correctly identified
PL1_sim4$condition <- "30% noise and 50% zero"

```

```
PL2_sim4 <- data.frame(result_sim4[, 7:12]) #zeros correctly identified
```

```
PL2_sim4$condition <- "30% noise and 50% zero"
```

```
PL1 <- rbind(PL1_sim1, PL1_sim2, PL1_sim3, PL1_sim4)
```

```
colnames(PL1)[1:6] <- c("CV", "RdCV", "BIC", "IS", "BL", "SS")
```

```
dat_temp <- melt(PL1, id.vars="condition", measure.vars=c("CV", "RdCV", "BIC", "IS", "BL", "SS"))
```

```
p <- ggplot(dat_temp, aes(x = variable, y = value)) +
```

```
  geom_boxplot()+
```

```
  scale_y_continuous(name = "Proportion of non-zero loadings correctedly selected", limits = c(0, 1)) +
```

```
  scale_x_discrete(name = "Variable selection methods") +
```

```
  ggtitle("I=80, J1=40, J2=10") + #do not forget to manually change this.
```

```
  theme_bw() +
```

```
  theme(plot.title = element_text(size = 14, family = "Tahoma", face = "bold"),
```

```
        text = element_text(size = 14, family = "Tahoma"),
```

```
        axis.title = element_text(face="bold"),
```

```
        axis.text.x=element_text(size = 12))+
```

```
  facet_grid(. ~ condition)
```

```
p
```

```
PL2 <- rbind(PL2_sim1, PL2_sim2, PL2_sim3, PL2_sim4)
```

```
colnames(PL2)[1:6] <- c("CV", "RdCV", "BIC", "IS", "BL", "SS")
```

```
dat_temp <- melt(PL2, id.vars="condition", measure.vars=c("CV", "RdCV", "BIC", "IS", "BL", "SS"))
```

```
p <- ggplot(dat_temp, aes(x = variable, y = value)) +
```

```
  geom_boxplot()+
```

```
  scale_y_continuous(name = "Proportion of zero loadings correctedly identified", limits = c(0, 1)) +
```

```
  scale_x_discrete(name = "Variable selection methods") +
```

```
  ggtitle("I=80, J1=40, J2=10") + #do not forget to manually change this.
```

```
  theme_bw() +
```

```
  theme(plot.title = element_text(size = 14, family = "Tahoma", face = "bold"),
```

```
text = element_text(size = 14, family = "Tahoma"),
axis.title = element_text(face="bold"),
axis.text.x=element_text(size = 12))+
facet_grid(. ~ condition)
p
```

### 11. summarizing results 4 blocks

```
#####
#####  sumarizing results of the simulation study #####
#####          (for revision)          #####
#####
```

```
library(ggplot2)
library(reshape2)
library(gridExtra)
library(devtools)
install_github("ZhengguoGu/RegularizedSCA")
library(RegularizedSCA)
```

```
##### PART 1a: Boxplots (4 data blocks), variable correctly selected and zeros correctly
identified #####
```

```
# I. summarizing data;
```

```
# Sim_1 0.5% noise and 30% zero #####
```

```
 #(note: load data by hand)
```

```
tucker_result_Sim1 <- cbind(RESULT_BenchmarkCV[,1],
```

```

    RESULT_rdCV[, 1],
    RESULT_BIC[,1],
    RESULT_IS[,1],
    RESULT_BoLasso[,1],
    RESULT_StabS[,1],
    "0.5% noise, 30% zeros")
colnames(tucker_result_Sim1) <- c("CV", "RdCV", "BIC", "IS", "BoLasso", "Stab. selection", "condition")

```

```

PL_Sim1 <- cbind(RESULT_BenchmarkCV[,2],
    RESULT_rdCV[, 2],
    RESULT_BIC[,2],
    RESULT_IS[,2],
    RESULT_BoLasso[,2],
    RESULT_StabS[,2],
    "0.5% noise, 30% zeros")
colnames(PL_Sim1) <- c("CV", "RdCV", "BIC", "IS", "BoLasso", "Stab. selection", "condition")
save(file = "sim1.RData", tucker_result_Sim1, PL_Sim1)

```

#####

# Sim\_2 0.5% noise and 50% zero #####

#(note: load data by hand)

```

tucker_result_Sim2 <- cbind(RESULT_BenchmarkCV[,1],
    RESULT_rdCV[, 1],
    RESULT_BIC[,1],
    RESULT_IS[,1],
    RESULT_BoLasso[,1],
    RESULT_StabS[,1],
    "0.5% noise, 50% zeros")
colnames(tucker_result_Sim2) <- c("CV", "RdCV", "BIC", "IS", "BoLasso", "Stab. selection", "condition")

```

```

PL_Sim2 <- cbind(RESULT_BenchmarkCV[,2],
               RESULT_rdCV[, 2],
               RESULT_BIC[,2],
               RESULT_IS[,2],
               RESULT_BoLasso[,2],
               RESULT_StabS[,2],
               "0.5% noise, 50% zeros")

colnames(PL_Sim2) <- c("CV", "RdCV", "BIC", "IS", "BoLasso", "Stab. selection", "condition")

save(file = "sim2.RData", tucker_result_Sim2, PL_Sim2)

#####

# Sim_3 30% noise and 30% zero #####
#(note: load data by hand)

tucker_result_Sim3 <- cbind(RESULT_BenchmarkCV[,1],
                           RESULT_rdCV[, 1],
                           RESULT_BIC[,1],
                           RESULT_IS[,1],
                           RESULT_BoLasso[,1],
                           RESULT_StabS[,1],
                           "30% noise, 30% zeros")

colnames(tucker_result_Sim3) <- c("CV", "RdCV", "BIC", "IS", "BoLasso", "Stab. selection", "condition")

PL_Sim3 <- cbind(RESULT_BenchmarkCV[,2],
                RESULT_rdCV[, 2],
                RESULT_BIC[,2],
                RESULT_IS[,2],
                RESULT_BoLasso[,2],
                RESULT_StabS[,2],

```

```

"30% noise, 30% zeros")
colnames(PL_Sim3) <- c("CV", "RdCV", "BIC", "IS", "BoLasso", "Stab. selection", "condition")
save(file = "sim3.RData", tucker_result_Sim3, PL_Sim3)

#####

# Sim_4 30% noise and 50% zero #####
#(note: load data by hand)
tucker_result_Sim4 <- cbind(RESULT_BenchmarkCV[,1],
    RESULT_rdCV[, 1],
    RESULT_BIC[,1],
    RESULT_IS[,1],
    RESULT_BoLasso[,1],
    RESULT_StabS[,1],
    "30% noise, 50% zeros")
colnames(tucker_result_Sim4) <- c("CV", "RdCV", "BIC", "IS", "BoLasso", "Stab. selection", "condition")

PL_Sim4 <- cbind(RESULT_BenchmarkCV[,2],
    RESULT_rdCV[, 2],
    RESULT_BIC[,2],
    RESULT_IS[,2],
    RESULT_BoLasso[,2],
    RESULT_StabS[,2],
    "30% noise, 50% zeros")
colnames(PL_Sim4) <- c("CV", "RdCV", "BIC", "IS", "BoLasso", "Stab. selection", "condition")
save(file = "sim4.RData", tucker_result_Sim4, PL_Sim4)

#####

load("sim1.RData")
load("sim2.RData")

```

```

load("sim3.RData")
load("sim4.RData")

PL <- rbind(PL_Sim1, PL_Sim2, PL_Sim3, PL_Sim4)
PL_final<- data.frame(apply(PL[, 1:6], 2, as.numeric))
PL_final$condition <- PL[, 7]
colnames(PL_final)[c(5, 6)] <- c("BL", "SS")
dat_temp <- melt(PL_final,id.vars="condition", measure.vars=c("CV", "RdCV", "BIC", "IS", "BL", "SS"))

```

```

p <- ggplot(dat_temp, aes(x = variable, y = value)) +
  geom_boxplot()+
  scale_y_continuous(name = "Proportion of loadings correctedly selected", limits = c(0, 1)) +
  scale_x_discrete(name = "Variable selection methods (4 blocks)") +
  #ggtitle("I=80, J1=40, J2=10") + #do not forget to manually change this.
  theme_bw() +
  theme(plot.title = element_text(size = 14, family = "Tahoma", face = "bold"),
        text = element_text(size = 14, family = "Tahoma"),
        axis.title = element_text(face="bold"),
        axis.text.x=element_text(size = 12))+
  facet_grid(. ~ condition)

```

p

```

Tucker_results <- rbind(tucker_result_Sim1, tucker_result_Sim2, tucker_result_Sim3,
tucker_result_Sim4)
Tucker_final<- data.frame(apply(Tucker_results[, 1:6], 2, as.numeric))
Tucker_final$condition <- Tucker_results[, 7]
colnames(Tucker_final)[c(5, 6)] <- c("BL", "SS")

```

```
dat_temp <- melt(Tucker_final,id.vars="condition", measure.vars=c("CV", "RdCV", "BIC", "IS", "BL",
"SS"))
```

```
p_tucker <- ggplot(dat_temp, aes(x = variable, y = value)) +
  geom_boxplot()+
  scale_y_continuous(name = "Tucker congruence", limits = c(0, 1)) +
  scale_x_discrete(name = "Variable selection methods (4 blocks)") +
  #ggtitle("I=80, J1=40, J2=10") + #do not forget to manually change this.
  theme_bw() +
  theme(plot.title = element_text(size = 14, family = "Tahoma", face = "bold"),
        text = element_text(size = 14, family = "Tahoma"),
        axis.title = element_text(face="bold"),
        axis.text.x=element_text(size = 12))+
  facet_grid(. ~ condition)
```

```
p_tucker
```

```
#####
#####
```

```
##### PART 1b: boxplot (4 data blocks), seperately for variable correctly selected and for
zeros corrected identified #####
```

```
# (authors' comment: first we have to record the number of non-zero loadings that are correctly
identified
```

```
# and also the number of zero loadings that are correctly identified.)
```

```
numNo0_correct <- function(MATa, MATb){
  num_corr <- sum((MATa != 0) & (MATb != 0))
  return(num_corr)
}
```

```
num0_correct <- function(MATa, MATb){
  num_corr <- sum((MATa == 0) & (MATb == 0))
```



```
return(num_corr)
}
```

```
ratio_nonzero_zero <- function(){
```

```
#file_names: it starts with "I_20_J1_120_J2_30", or something like this.
```

```
fnames <- "1_benchmark_CV.RData"
```

```
load(fnames)
```

```
fnames <- "3_BIC_IS.RData"
```

```
load(fnames)
```

```
fnames <- "4_BOLASSO.RData"
```

```
load(fnames)
```

```
fnames <- "2_RepeatedDCV.RData"
```

```
load(fnames)
```

```
fnames <- "5_Stability.RData"
```

```
load(fnames)
```

```
###
```

```
n_dataset <- 1
```

```
numNo0_true <- array()
```

```
num0_true <- array()
```

```
numNo0 crt_Benchmark <- array() #number of non-zero loadings
```

```
num0_Benchmark <- array()
```

```
numNo0 crt_RdCV <- array()
```

```
num0_RdCV <- array()
```

```
numNo0 crt_BIC <- array()
```

```
num0_BIC <- array()
```

```
numNo0_crt_IS <- array()
num0_IS <- array()
numNo0_crt_Bolasso <- array()
num0_Bolasso <- array()
numNo0_crt_Stab <- array()
num0_Stab <- array()
```

```
while(n_dataset <= 20){
```

```
  filename <- paste("Data_", n_dataset, ".RData", sep = "")
```

```
  load(filename)
```

```
  numNo0_true[n_dataset] <- sum(my_data_list$P_mat !=0)
```

```
  num0_true[n_dataset] <- sum(my_data_list$P_mat ==0)
```

```
  #BenchmarkCV
```

```
  tuckerresult <- RegularizedSCA::TuckerCoef(my_data_list$T_mat, ESTIMATED_T[[n_dataset]])
```

```
  numNo0_crt_Benchmark[n_dataset] <- numNo0_correct(ESTIMATED_P[[n_dataset]][,
tuckerresult$perm], my_data_list$P_mat )
```

```
  num0_Benchmark[n_dataset] <- num0_correct(ESTIMATED_P[[n_dataset]][,
my_data_list$P_mat )
```

```
  #RdCV
```

```
  tuckerresult <- RegularizedSCA::TuckerCoef(my_data_list$T_mat, ESTIMATED_TrdrCV[[n_dataset]])
```

```
  numNo0_crt_RdCV[n_dataset] <- numNo0_correct(ESTIMATED_PrdCV[[n_dataset]][,
tuckerresult$perm], my_data_list$P_mat )
```

```
  num0_RdCV[n_dataset] <- num0_correct(ESTIMATED_PrdCV[[n_dataset]][,
my_data_list$P_mat )
```

```

#BIC

tuckerresult <- RegularizedSCA::TuckerCoef(my_data_list$T_mat, ESTIMATED_Tbic[[n_dataset]])

numNo0_crt_BIC[n_dataset] <- numNo0_correct(ESTIMATED_Pbic[[n_dataset]][, tuckerresult$perm],
my_data_list$P_mat )

num0_BIC[n_dataset] <- num0_correct(ESTIMATED_Pbic[[n_dataset]][, tuckerresult$perm],
my_data_list$P_mat )

#IS

tuckerresult <- RegularizedSCA::TuckerCoef(my_data_list$T_mat, ESTIMATED_TIS[[n_dataset]])

numNo0_crt_IS[n_dataset] <- numNo0_correct(ESTIMATED_PIS[[n_dataset]][, tuckerresult$perm],
my_data_list$P_mat )

num0_IS[n_dataset] <- num0_correct(ESTIMATED_PIS[[n_dataset]][, tuckerresult$perm],
my_data_list$P_mat )

#Bolasso

tuckerresult <- RegularizedSCA::TuckerCoef(my_data_list$T_mat, ESTIMATED_Tbolasso[[n_dataset]])

numNo0_crt_Bolasso[n_dataset] <- numNo0_correct(ESTIMATED_Pbolasso[[n_dataset]][,
tuckerresult$perm], my_data_list$P_mat )

num0_Bolasso[n_dataset] <- num0_correct(ESTIMATED_Pbolasso[[n_dataset]][, tuckerresult$perm],
my_data_list$P_mat )

#Stability Selection

tuckerresult <- RegularizedSCA::TuckerCoef(my_data_list$T_mat, ESTIMATED_TStabS[[n_dataset]])

numNo0_crt_Stab[n_dataset] <- numNo0_correct(ESTIMATED_PStabS[[n_dataset]][,
tuckerresult$perm], my_data_list$P_mat )

num0_Stab[n_dataset] <- num0_correct(ESTIMATED_PStabS[[n_dataset]][, tuckerresult$perm],
my_data_list$P_mat )

n_dataset <- n_dataset + 1
}

Ratio_numNo0_crt_Benchmark <- numNo0_crt_Benchmark / numNo0_true

```

```

Ratio_num0_Benchmark <- num0_Benchmark / num0_true
Ratio_numNo0_crt_RdCV <- numNo0_crt_RdCV / numNo0_true
Ratio_num0_RdCV <- num0_RdCV / num0_true
Ratio_numNo0_crt_BIC <- numNo0_crt_BIC / numNo0_true
Ratio_num0_BIC <- num0_BIC / num0_true
Ratio_numNo0_crt_IS <- numNo0_crt_IS / numNo0_true
Ratio_num0_IS <- num0_IS / num0_true
Ratio_numNo0_crt_Bolasso <- numNo0_crt_Bolasso / numNo0_true
Ratio_num0_Bolasso <- num0_Bolasso / num0_true
Ratio_numNo0_crt_Stab <- numNo0_crt_Stab / numNo0_true
Ratio_num0_Stab <- num0_Stab / num0_true

result <- cbind(Ratio_numNo0_crt_Benchmark, Ratio_numNo0_crt_RdCV, Ratio_numNo0_crt_BIC,
Ratio_numNo0_crt_IS, Ratio_numNo0_crt_Bolasso, Ratio_numNo0_crt_Stab,
                Ratio_num0_Benchmark, Ratio_num0_RdCV, Ratio_num0_BIC, Ratio_num0_IS,
Ratio_num0_Bolasso, Ratio_num0_Stab)
return(result)
}

```

```

### folder 2block_I20_J120_30

```

```

# note, change directory to the correct subfolder

```

```

# Sim_1 0.5% noise and 30% zero #####

```

```

result_sim1 <- ratio_nonzero_zero()

```

```

save(result_sim1, file = "seperate_sim1.RData")

```

```

# Sim_2 0.5% noise and 50% zero #####

```

```

result_sim2 <- ratio_nonzero_zero()

```

```

save(result_sim2, file = "seperate_sim2.RData")

```

```

# Sim_3 30% noise and 30% zero #####

```

```
result_sim3 <- ratio_nonzero_zero()
save(result_sim3, file = "seperate_sim3.RData")
# Sim_4 30% noise and 50% zero #####
result_sim4 <- ratio_nonzero_zero()
save(result_sim4, file = "seperate_sim4.RData")
```

```
##### boxplots
```

```
library(ggplot2)
```

```
library(reshape2)
```

```
library(gridExtra)
```

```
PL1_sim1 <- data.frame(result_sim1[, 1:6]) #variables correctly identified
```

```
PL1_sim1$condition <- "0.5% noise and 30% zero"
```

```
PL2_sim1 <- data.frame(result_sim1[, 7:12]) #zeros correctly identified
```

```
PL2_sim1$condition <- "0.5% noise and 30% zero"
```

```
PL1_sim2 <- data.frame(result_sim2[, 1:6]) #variables correctly identified
```

```
PL1_sim2$condition <- "0.5% noise and 50% zero"
```

```
PL2_sim2 <- data.frame(result_sim2[, 7:12]) #zeros correctly identified
```

```
PL2_sim2$condition <- "0.5% noise and 50% zero"
```

```
PL1_sim3 <- data.frame(result_sim3[, 1:6]) #variables correctly identified
```

```
PL1_sim3$condition <- "30% noise and 30% zero"
```

```
PL2_sim3 <- data.frame(result_sim3[, 7:12]) #zeros correctly identified
```

```
PL2_sim3$condition <- "30% noise and 30% zero"
```

```
PL1_sim4 <- data.frame(result_sim4[, 1:6]) #variables correctly identified
```

```
PL1_sim4$condition <- "30% noise and 50% zero"
```

```
PL2_sim4 <- data.frame(result_sim4[, 7:12]) #zeros correctly identified
```

```
PL2_sim4$condition <- "30% noise and 50% zero"
```

```

PL1 <- rbind(PL1_sim1, PL1_sim2, PL1_sim3, PL1_sim4)
colnames(PL1)[1:6] <- c("CV", "RdCV", "BIC", "IS", "BL", "SS")
dat_temp <- melt(PL1, id.vars="condition", measure.vars=c("CV", "RdCV", "BIC", "IS", "BL", "SS"))
p <- ggplot(dat_temp, aes(x = variable, y = value)) +
  geom_boxplot()+
  scale_y_continuous(name = "Proportion of non-zero loadings correctedly selected", limits = c(0, 1)) +
  scale_x_discrete(name = "Variable selection methods (4 blocks)") +
  #ggtitle("I=80, J1=40, J2=10") + #do not forget to manually change this.
  theme_bw() +
  theme(plot.title = element_text(size = 14, family = "Tahoma", face = "bold"),
        text = element_text(size = 14, family = "Tahoma"),
        axis.title = element_text(face="bold"),
        axis.text.x=element_text(size = 12))+
  facet_grid(. ~ condition)
p

```

```

PL2 <- rbind(PL2_sim1, PL2_sim2, PL2_sim3, PL2_sim4)
colnames(PL2)[1:6] <- c("CV", "RdCV", "BIC", "IS", "BL", "SS")
dat_temp <- melt(PL2, id.vars="condition", measure.vars=c("CV", "RdCV", "BIC", "IS", "BL", "SS"))
p <- ggplot(dat_temp, aes(x = variable, y = value)) +
  geom_boxplot()+
  scale_y_continuous(name = "Proportion of zero loadings correctedly identified", limits = c(0, 1)) +
  scale_x_discrete(name = "Variable selection methods (4 blocks)") +
  #ggtitle("I=80, J1=40, J2=10") + #do not forget to manually change this.
  theme_bw() +
  theme(plot.title = element_text(size = 14, family = "Tahoma", face = "bold"),
        text = element_text(size = 14, family = "Tahoma"),
        axis.title = element_text(face="bold"),
        axis.text.x=element_text(size = 12))+

```

```
facet_grid(. ~ condition)
```

p
